# Supplementary material for: An OTX2-PAX3 signaling axis regulates Group 3 medulloblastoma cell fate
Source: PubMed Central journal article supplement — Nat Commun. 2020 Jul 20;11:3627. doi: 10.1038/s41467-020-17357-4 (PMC7371715; doi:10.1038/s41467-020-17357-4), 2020-07-20
Supplement: 41467_2020_17357_MOESM1_ESM.pdf [file 41467_2020_17357_MOESM1_ESM.pdf]

**An OTX2-PAX3 signaling axis regulates Group 3 medulloblastoma cell fate**

Zagozewski et al.,

**Supplementary Information**

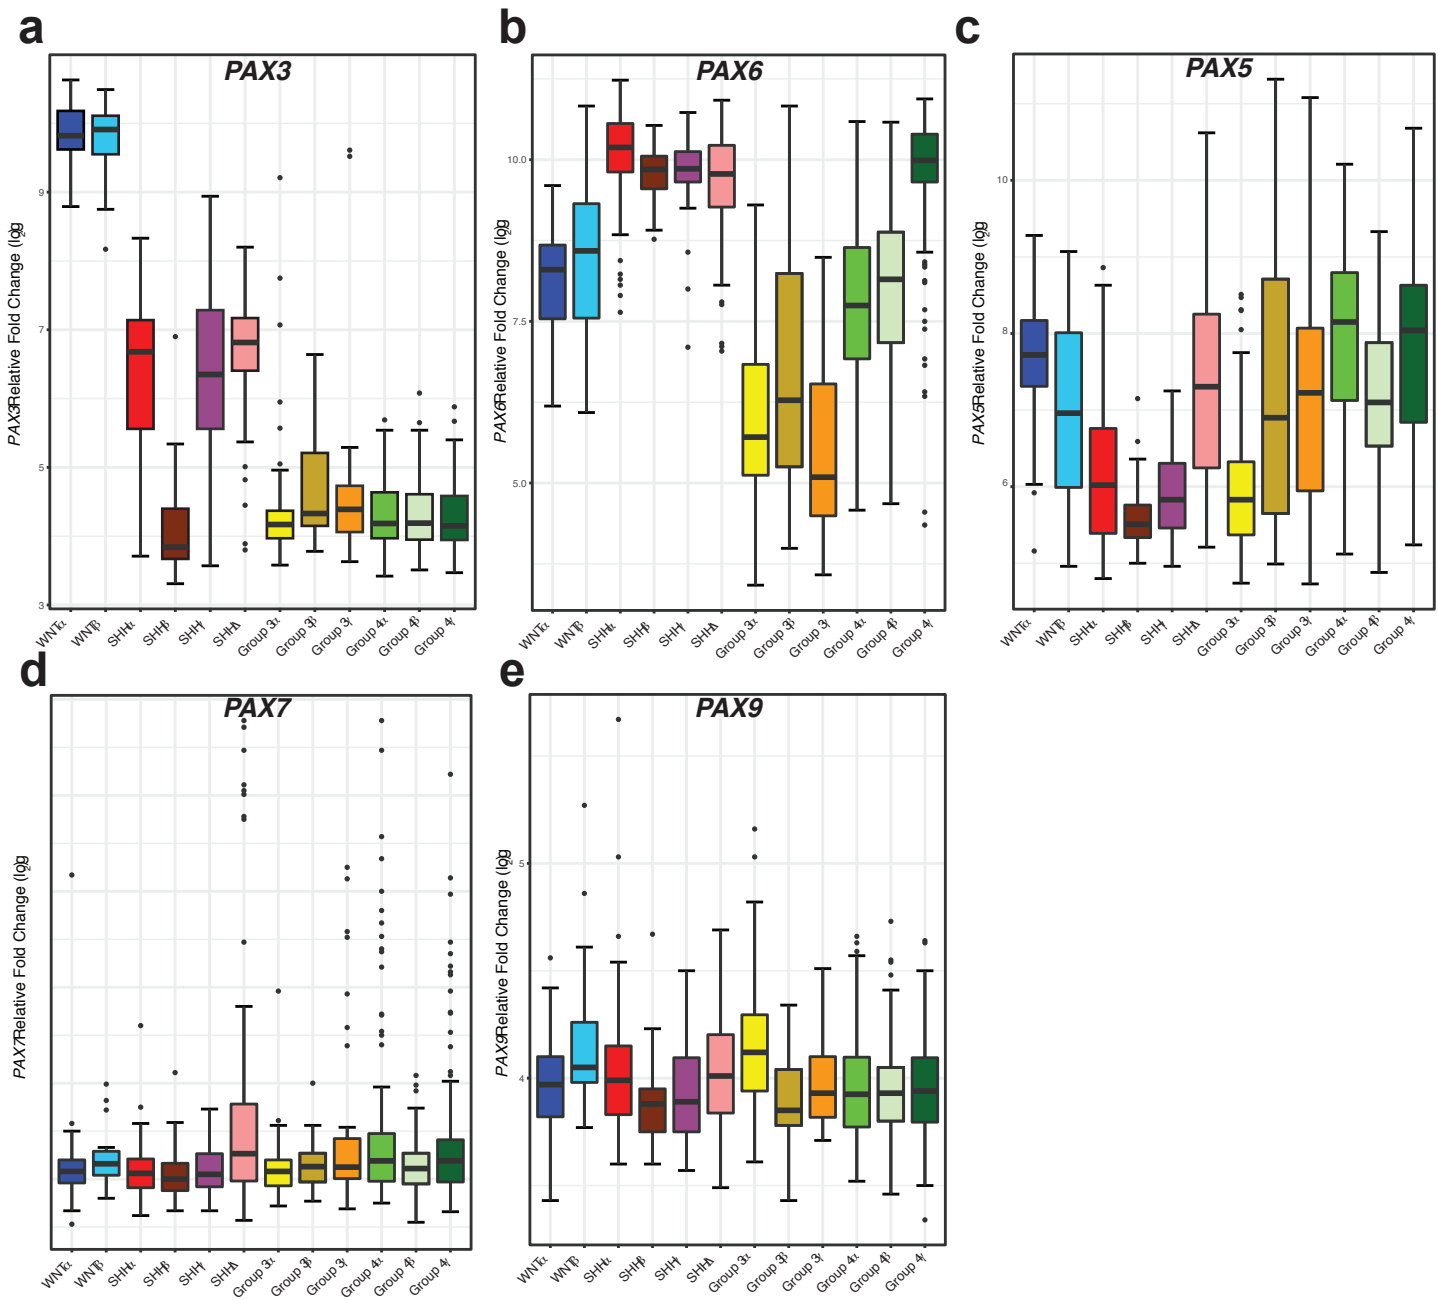

**Supplementary Figure 1: PAX family gene expression across the 12 medulloblastoma**

**subtypes.** *PAX3* (a), *PAX6* (b), *PAX5* (c), *PAX7* (d) and *PAX9* (e) gene expression across the 12 medulloblastoma subtypes from 763 medulloblastoma patient samples (MAGIC cohort). The centre line represents the median, the box represents the interquartile range, and the whiskers are the 95% confidence intervals. Data are presented as log<sub>2</sub>-transformed signal intensity.

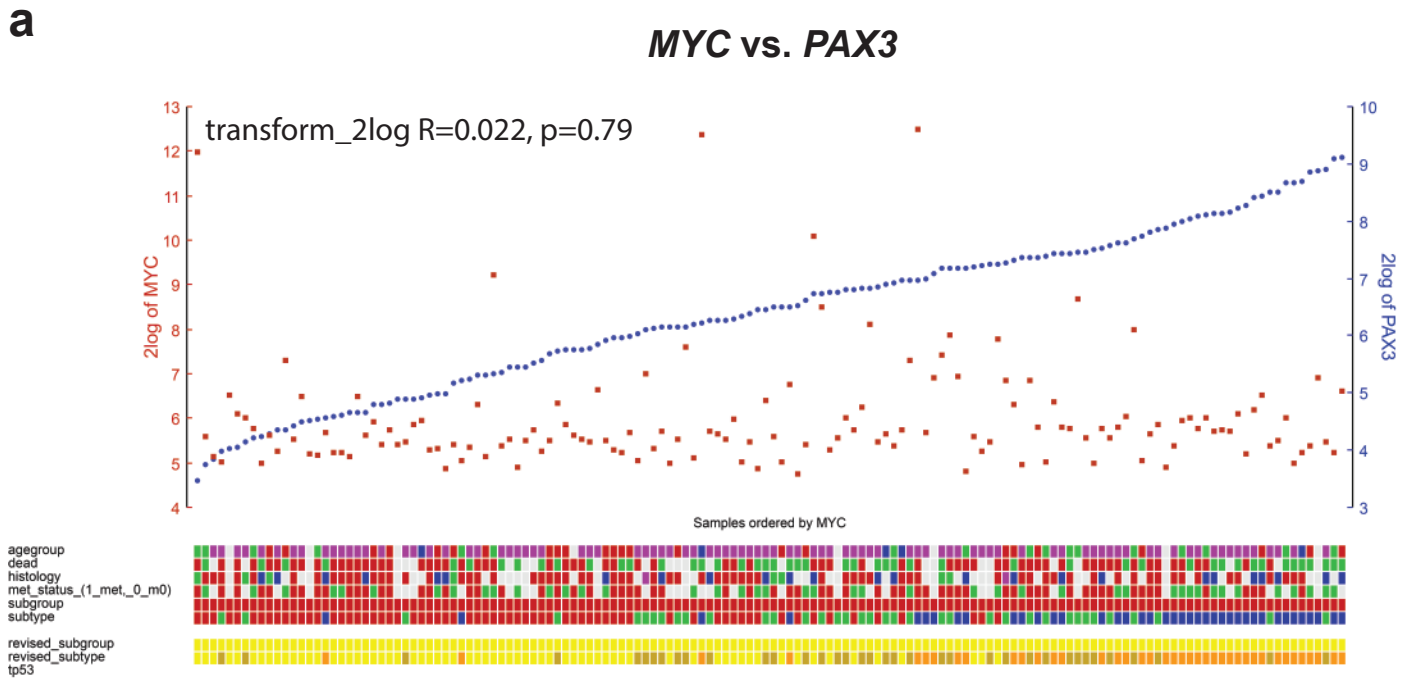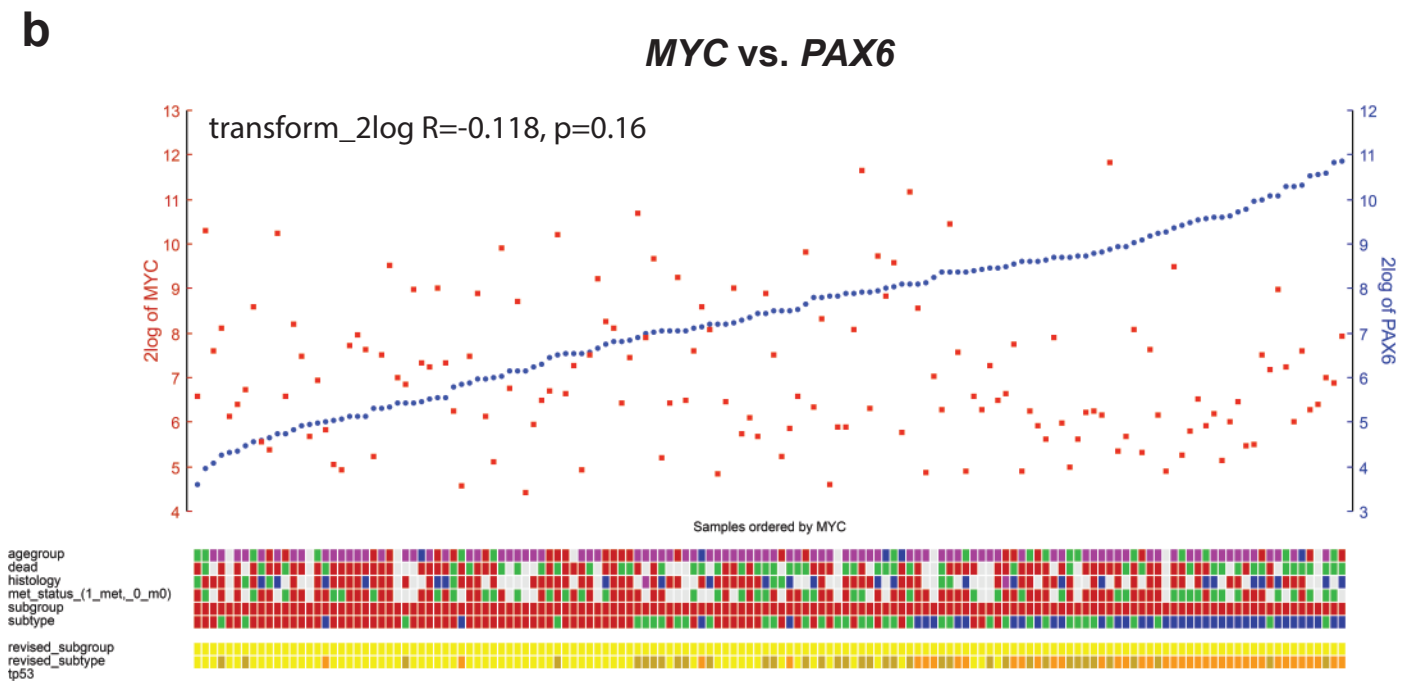

**Supplementary Figure 2: *PAX3* and *PAX6* expression are not correlated with *MYC* expression in Group 3 medulloblastoma patient samples.** YY scatterplots evaluating the correlation between *MYC* and *PAX3* (a) and *MYC* and *PAX6* (b) expression in Group 3 medulloblastoma patient samples using a Pearson correlation test. Data are presented as log2-transformed signal intensity.

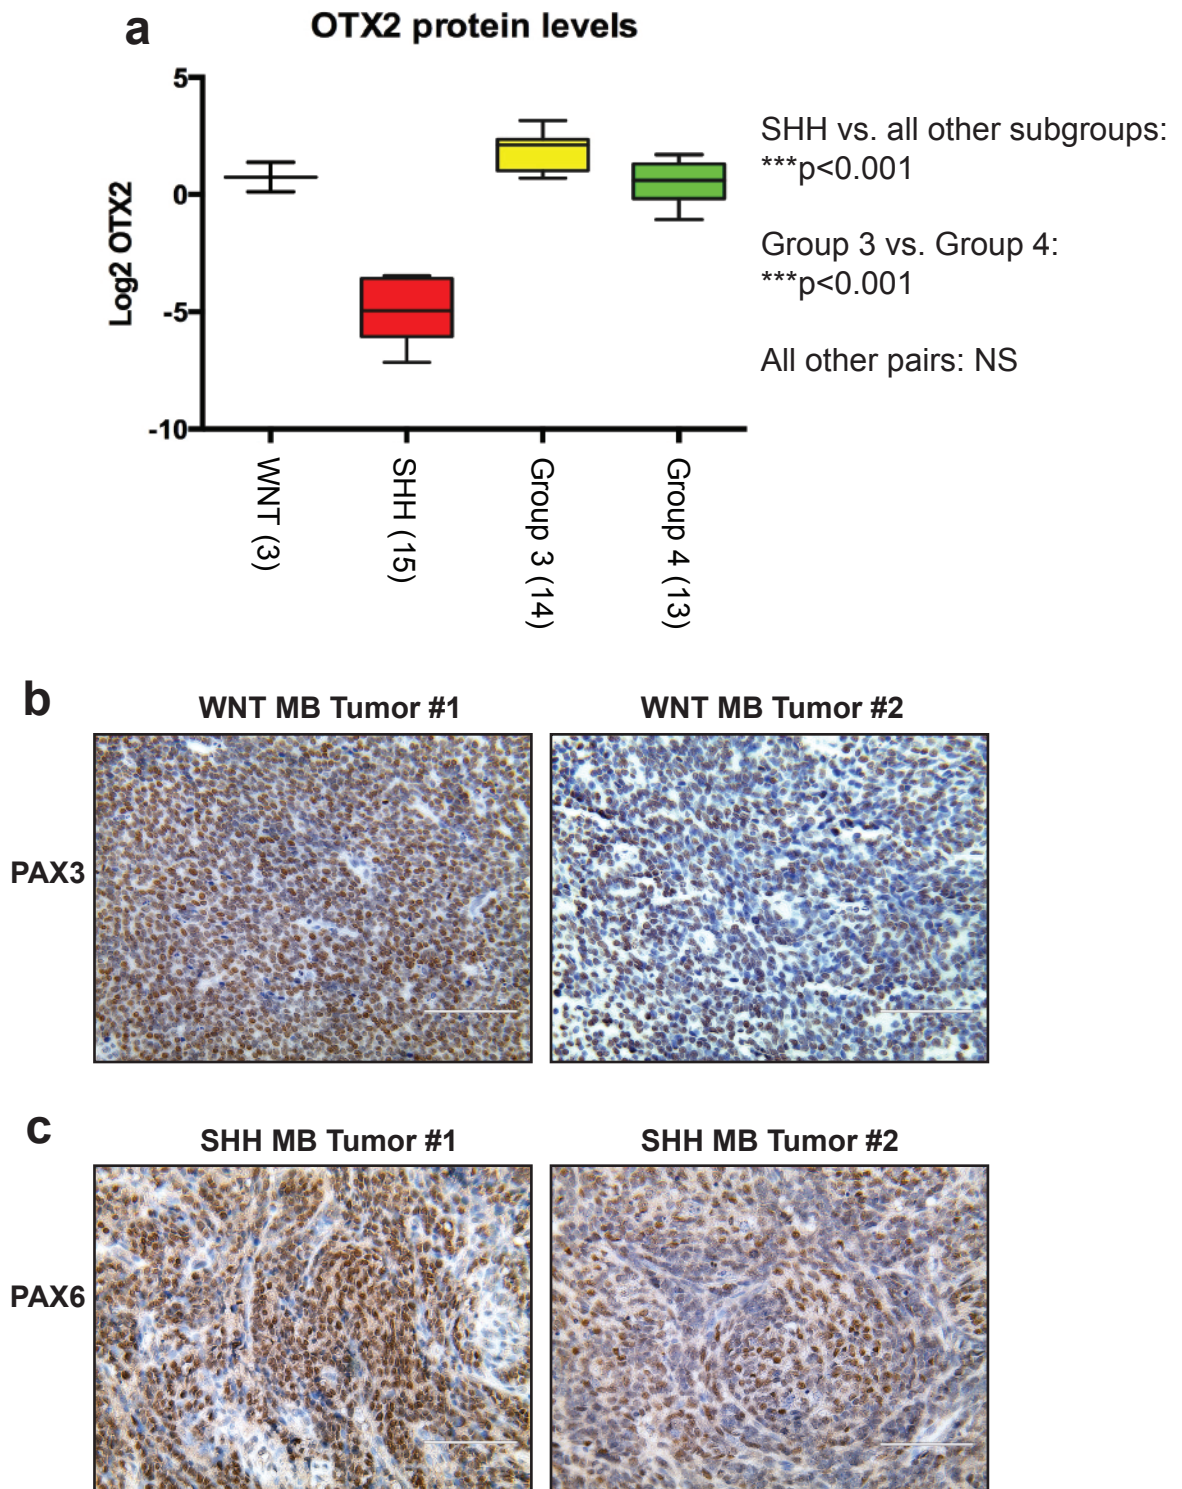

**Supplementary Figure 3: OTX2, PAX3 and PAX6 levels in representative**

**medulloblastoma patient samples. a.** Proteomic analysis (Boston cohort) shows high OTX2 levels in WNT, Group 3 and Group 4 medulloblastoma patient samples (45 total). SHH vs. all others, \*\*\* $p < 0.001$ , Group 3 vs. Group 4, \*\*\* $p < 0.001$ , all other pairs NS. Significance was determined by one-way ANOVA. **b.** Images of PAX3 IHC staining in representative formalin-fixed, paraffin embedded sections from 2 primary WNT medulloblastoma samples. Scale bar: 100  $\mu\text{m}$ . **c.** Images of PAX6 IHC staining in representative formalin-fixed, paraffin embedded sections from 2 primary SHH medulloblastoma samples. Scale bar: 100  $\mu\text{m}$ .

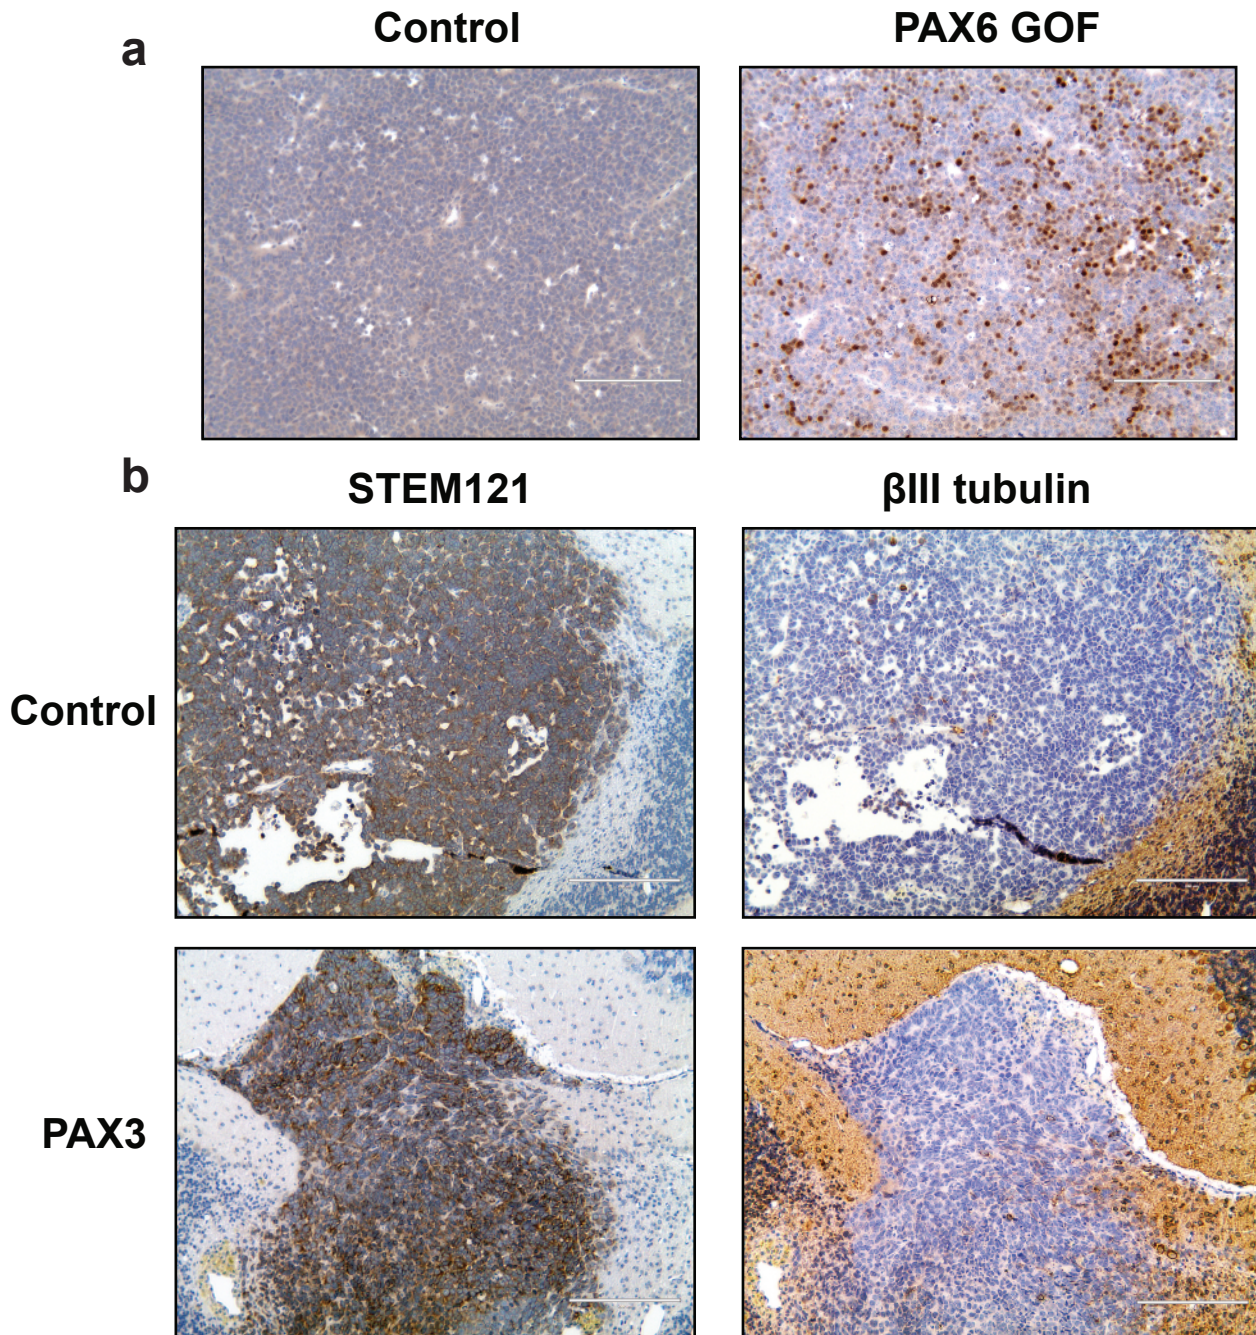

**Supplementary Figure 4: Immunohistochemical analysis following transplantation of control, PAX3 and PAX6 GOF HDMB03 medulloblastoma cells into NOD SCID mice. a.** PAX6 levels in control (left) relative to PAX6 GOF (right) HDMB03 medulloblastoma tumor-bearing NOD SCID mice Scale bar: 200  $\mu$ m. IHC was performed on 4 independent tumor samples for both control and PAX6 GOF. **b.** Representative sister sections depicting STEM121(left) and  $\beta$ III tubulin levels (right) in control (upper) and PAX3 GOF (lower) HDMB03 medulloblastoma tumor-bearing NOD SCID mouse. Scale bar: 200  $\mu$ m. IHC was performed on 4 independent tumor samples for both control and PAX3 GOF.

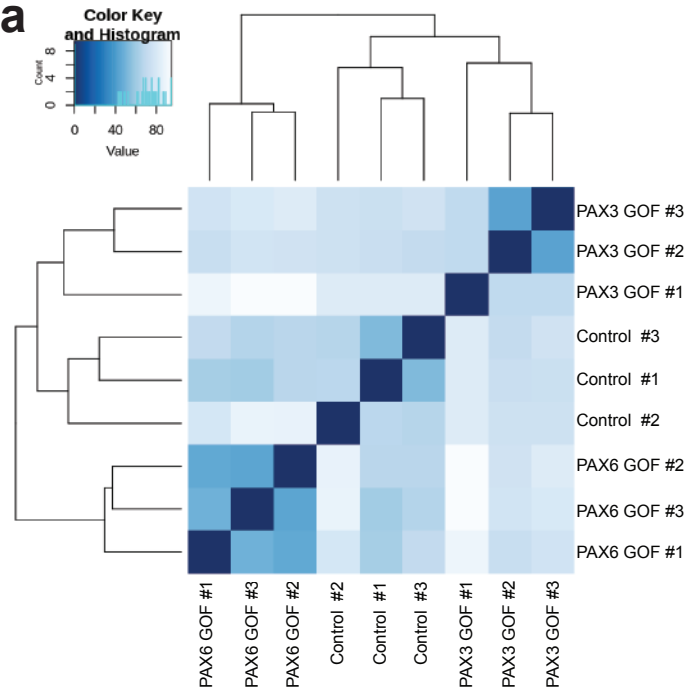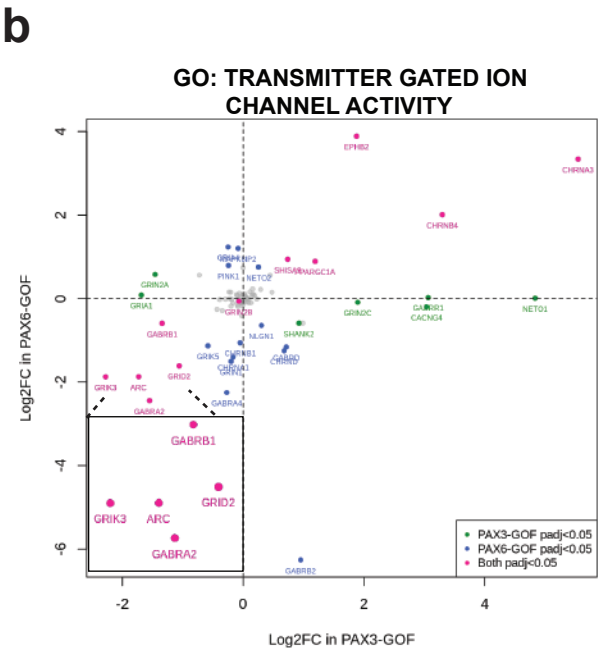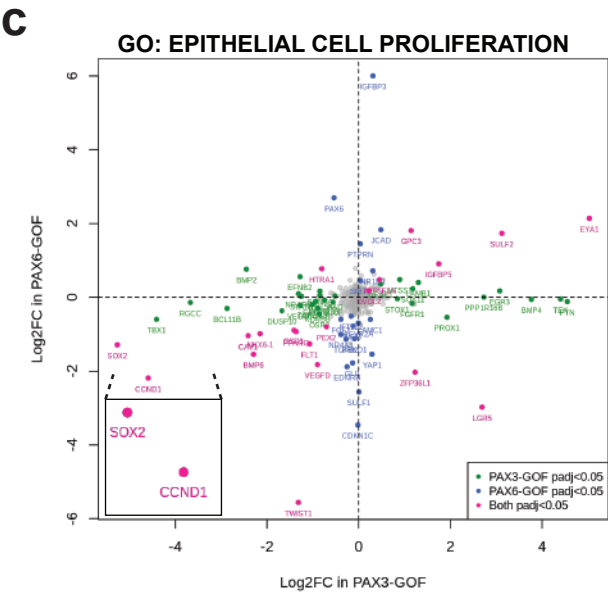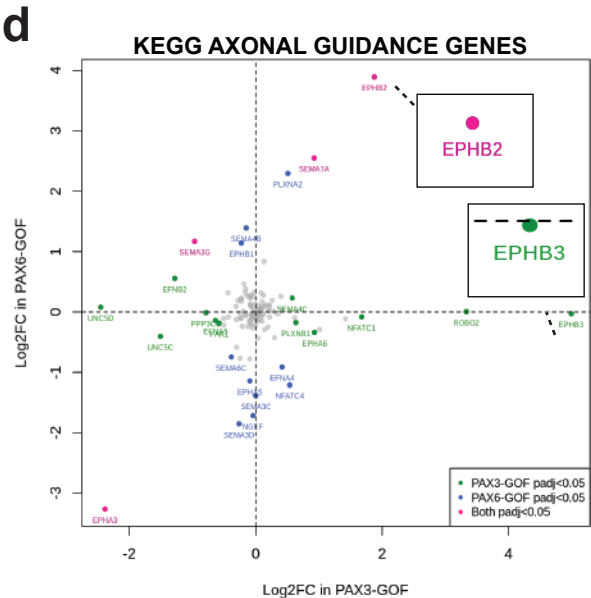

**Supplementary Figure 5: PAX3 and PAX6 expression perturb Group 3 transcriptional**

**signatures as well as genes associated with self-renewal and differentiation. a.** Hierarchical

clustering calculated using Euclidian distance between rlog-transformed normalized count

values for all transcripts. **b-d.** Enrichment of GO molecular function/biological process terms

and KEGG pathways in up- and down-regulated genes associated with PAX3, PAX6 or both

PAX3 and PAX6 GOF tumorspheres. For transmitted gated ion channel activity (b), epithelial

cell proliferation (c) and axonal guidance genes (d), Green= genes differentially expressed in

PAX3 GOF cells, Blue= genes differentially expressed in PAX6 GOF cells, and Pink= genes

differentially expressed in both PAX3 and PAX6 GOF cells. Significantly different genes were

identified using a q-value (Benjamini-Hochberg corrected p-value) cut-off of 0.05. For all genes

\*  $p < 0.05$ .

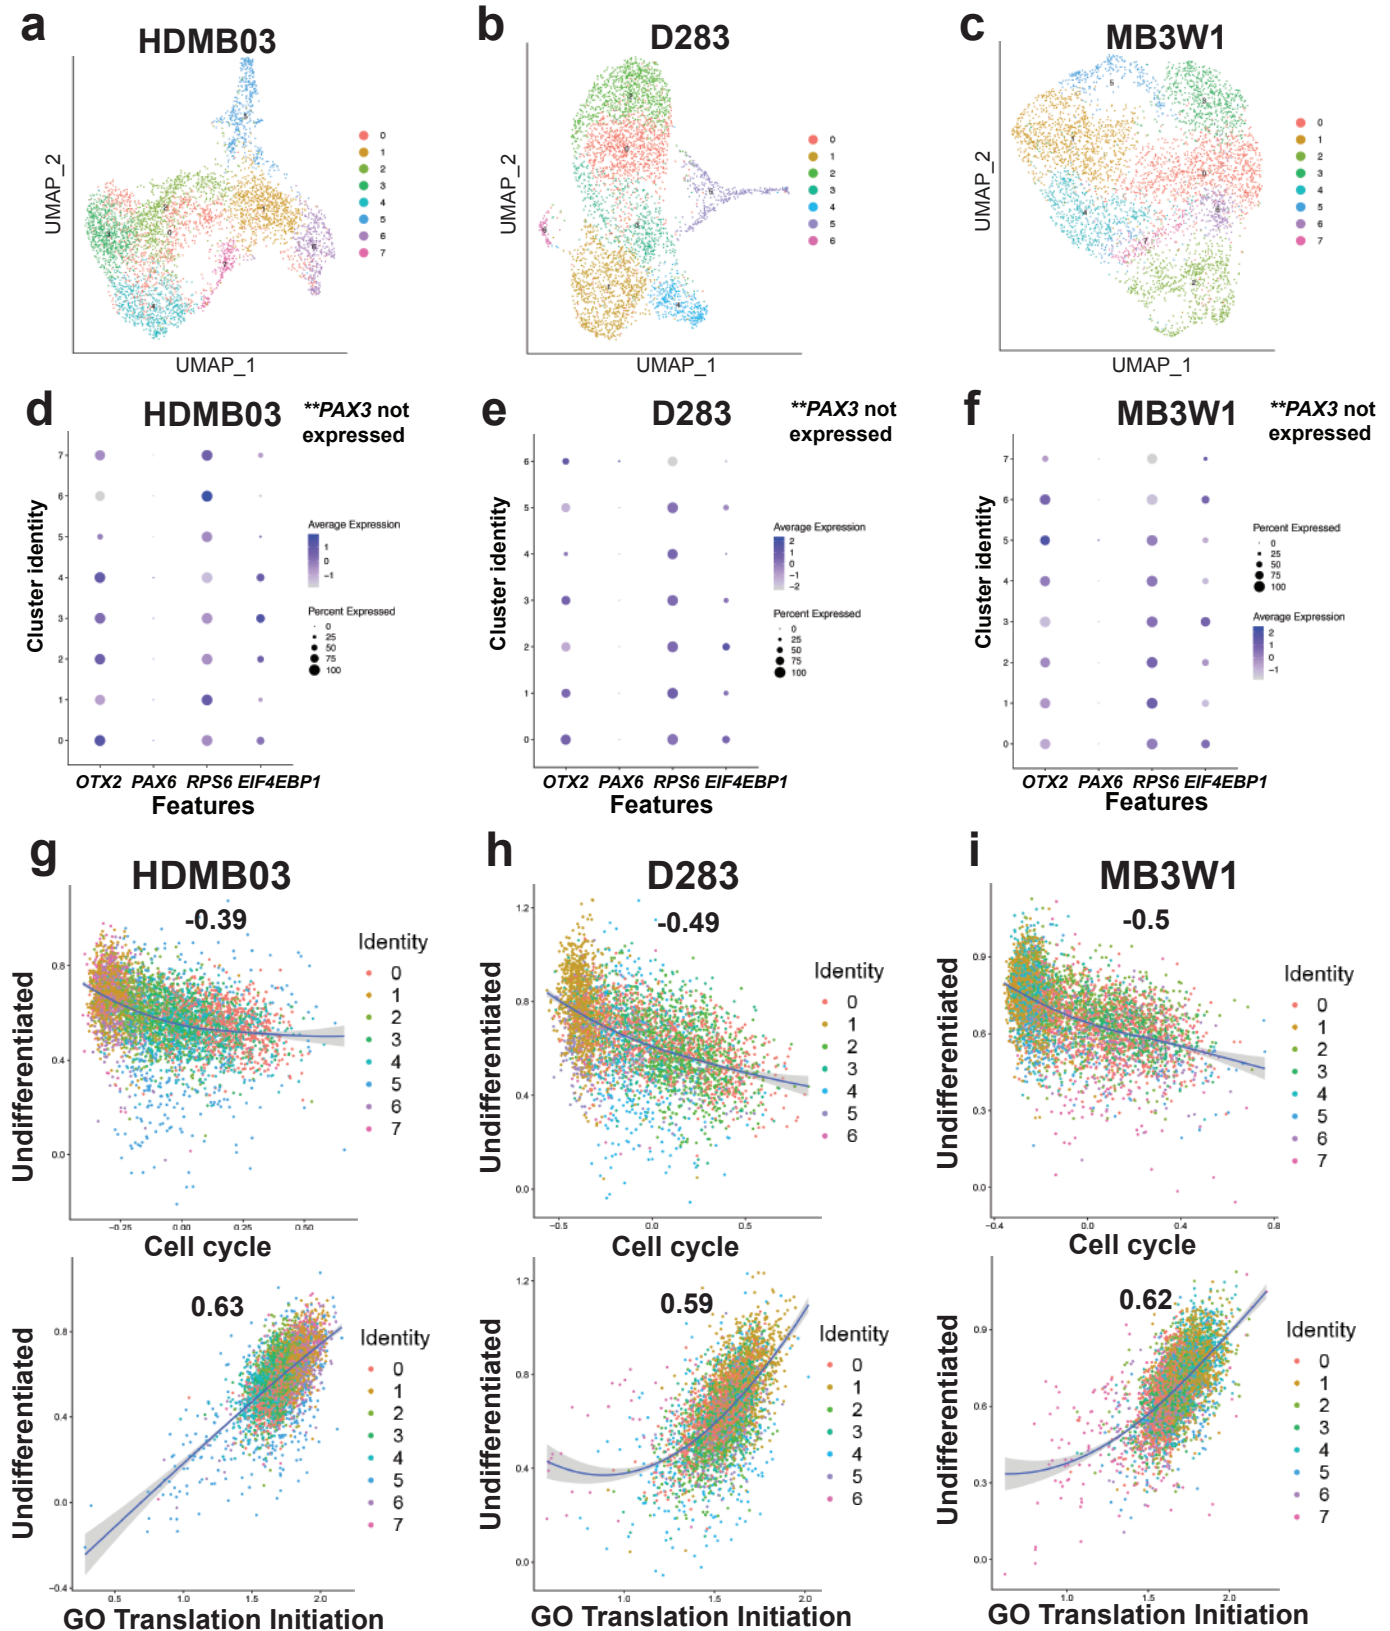

**Supplementary Figure 6: scRNA-seq analyses of Group 3 MB tumorspheres reveals a correlation between the undifferentiated stem/progenitor cell population and protein synthesis pathways. a-c.** UMAP visualization of transcriptionally distinct cell populations from HDMB03 (a), D283 (b) and MB3W1 (c) Group 3 MB tumorspheres. **d-f.** Dot plots demonstrating frequency and average expression of selected genes from single cell clusters of HDMB03 (d), D283 (e) and MB3W1 (f) Group 3 MB tumorspheres. **g-i.** Correlation plots displaying the relationship between the undifferentiated program and cell cycle (upper) as well as the undifferentiated program and translation initiation (lower) for HDMB03 (g), D283 (h) and MB3W1 (i) Group 3 MB tumorspheres. For the 3 biologically independent cell lines, n=6307 cells (HDMB03), n=5297 cells (D283), and n=5099 cells (MB3W1). Shaded area represents the 95% confidence level interval for predictions from a loess model.

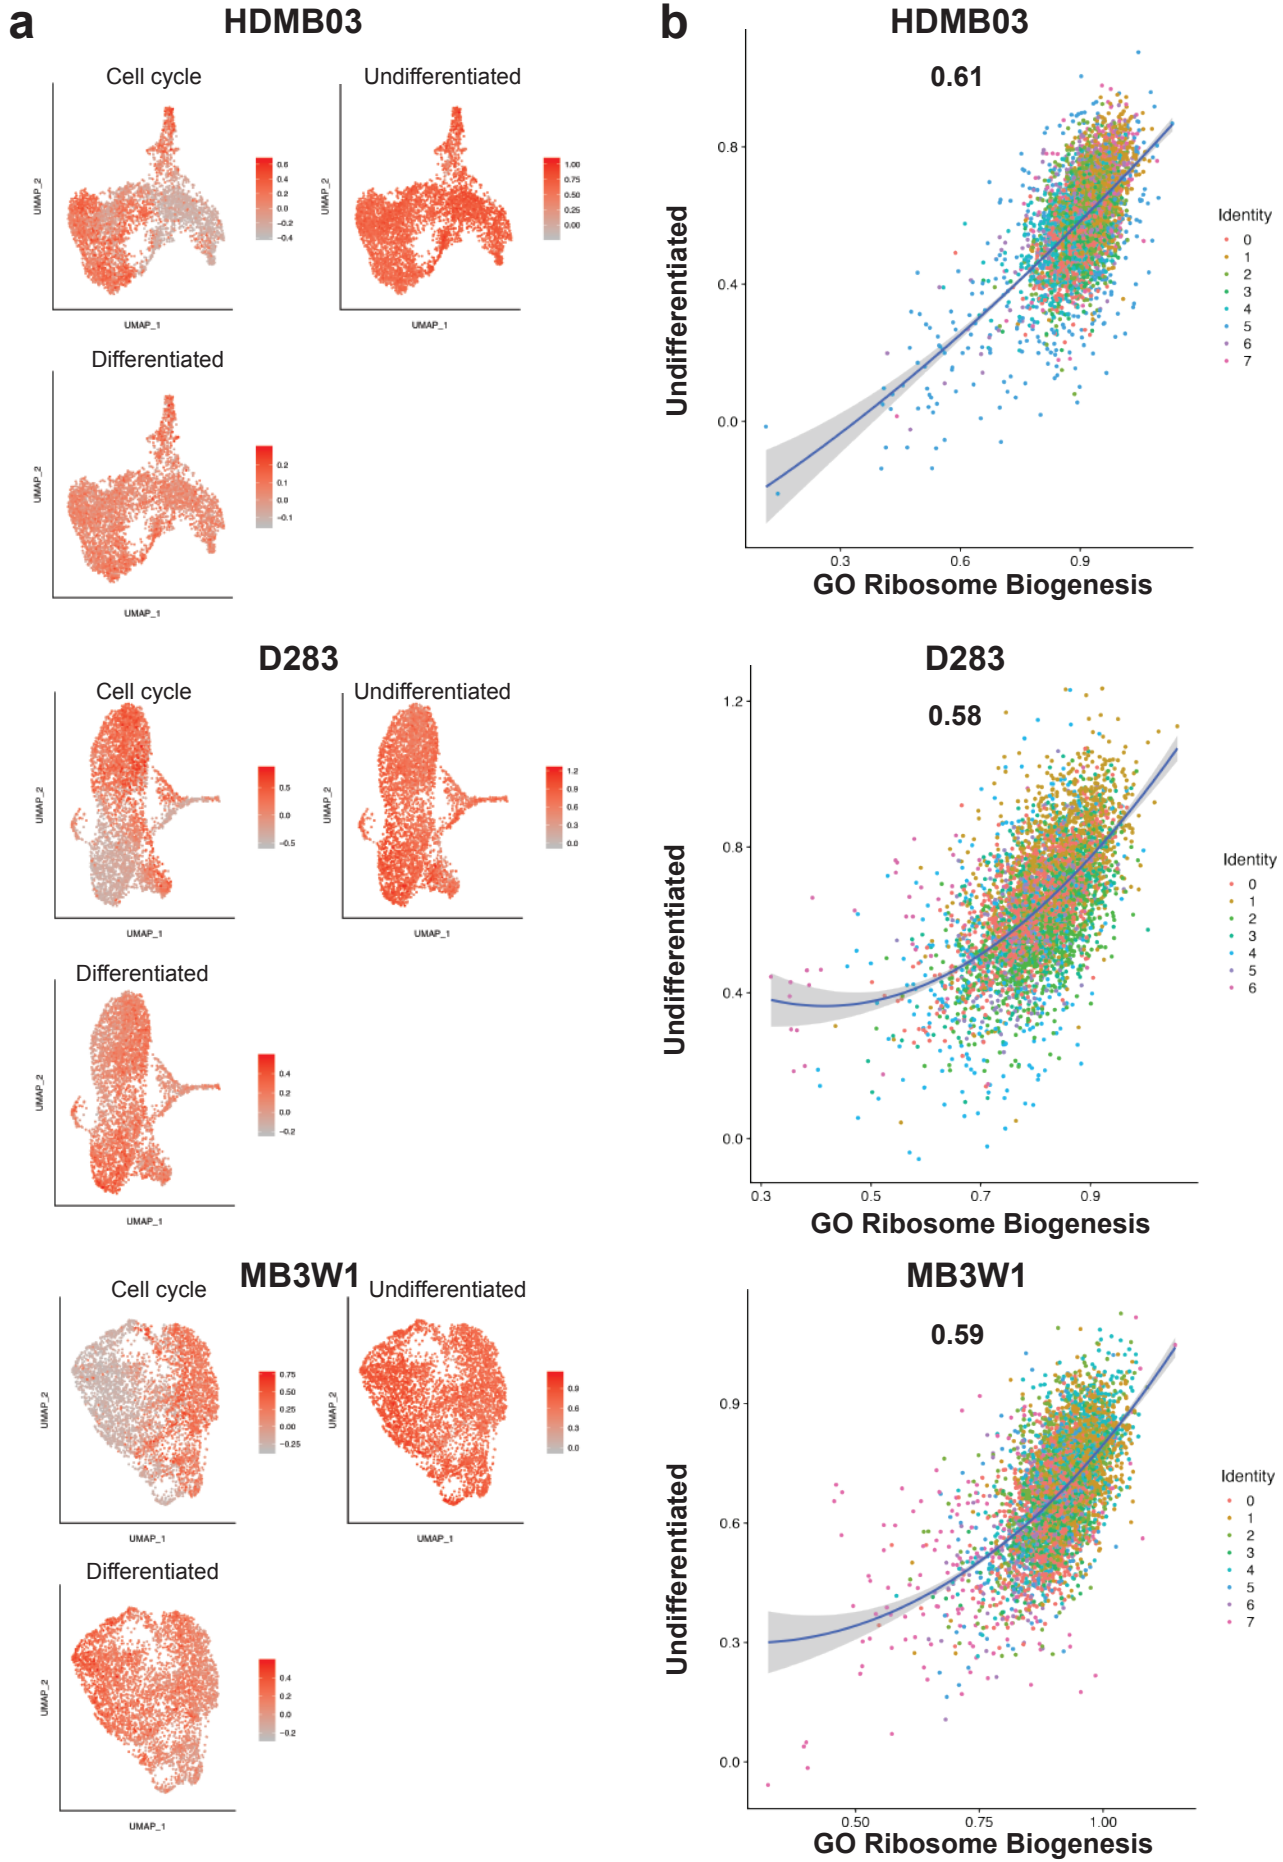

**Supplementary Figure 7: Gene expression associated with transcriptional metaprograms defined by Hovestadt et al., Nature, 2019.** **a.** Feature plots displaying the average expression of the top 30 genes in each metaprogram (cell cycle, undifferentiated and differentiated programs) overlain on the UMAP plots. **b.** Correlation plots between the undifferentiated metaprogram and genes involved in ribosome biogenesis (GO\_Ribosome\_Biogenesis) for HDMB03, D283, and MB3W1 Group 3 medulloblastoma tumorspheres. For the 3 biologically independent cell lines, n=6307 cells (HDMB03), n=5297 cells (D283), and n=5099 cells (MB3W1). Shaded area represents the 95% confidence level interval for predictions from a loess model.

**a** STEM121

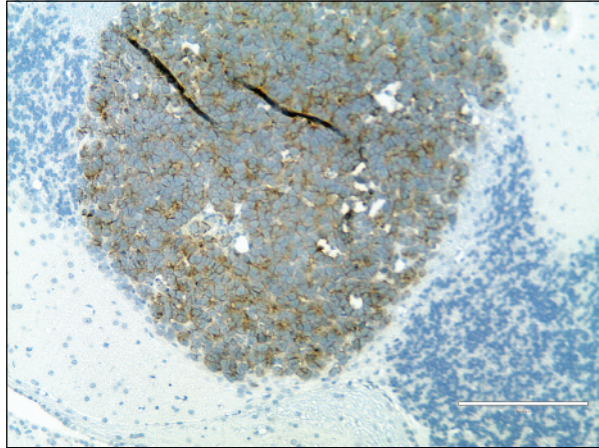

**βIII tubulin**

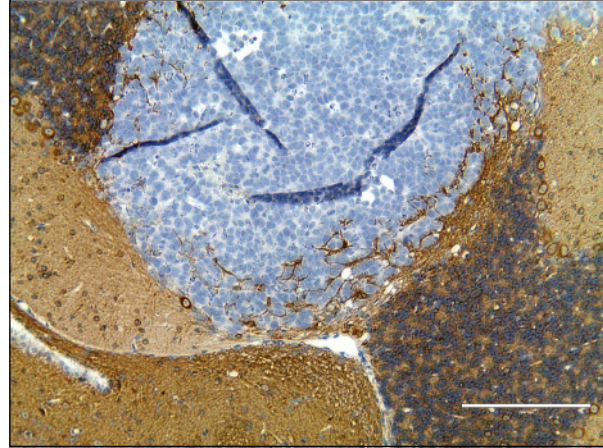

**b** AZD8055

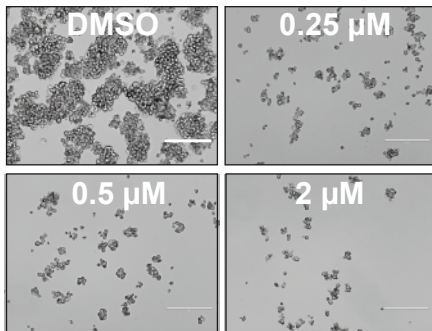

**c**

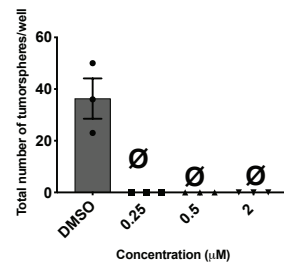

**d**

**PQR620**

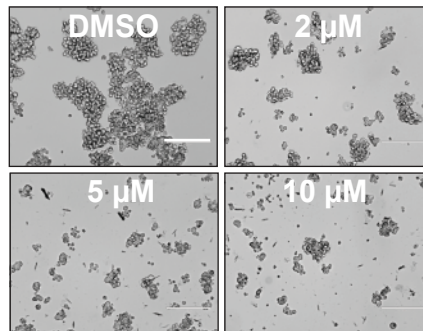

**e**

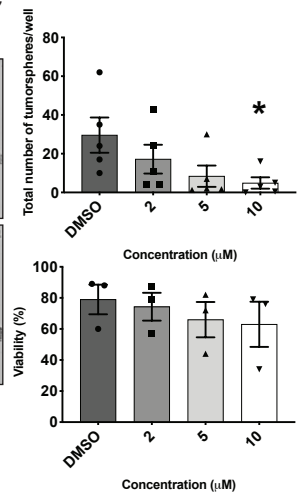

**f**

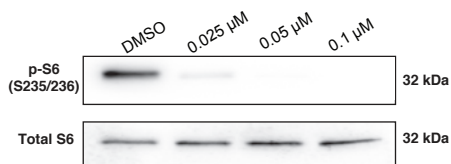

**g**

**Primary Tumorspheres**

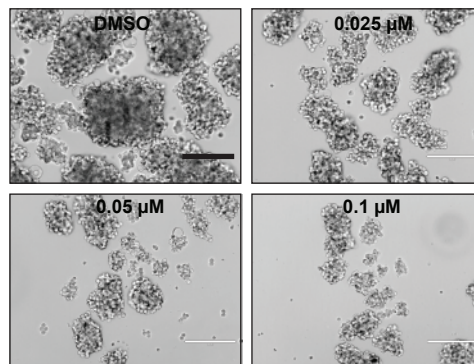

**h**

**Secondary Tumorspheres**

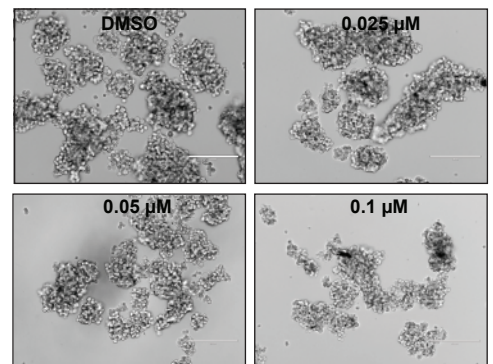

**Supplementary Figure 8: mTOR inhibitor treatment decreases Group 3 medulloblastoma**

**tumorigenic properties *in vitro*.** **a.** Representative sister sections depicting STEM121 and  $\beta$ III tubulin levels in a 100 mg/kg PQR620-treated HDMB03 medulloblastoma tumor-bearing NOD SCID mouse. Scale bar: 200  $\mu$ m. **b.** Representative images depicting decrease in tumorsphere number following AZD8055 treatment of MB3W1 Group 3 medulloblastoma cells. Scale = 200  $\mu$ m. **c.** Quantification of total sphere number following MB3W1 Group 3 tumorsphere treatment with AZD8055. Data are presented as mean values  $\pm$  SEM. N=3 biological replicates. Note that viability was not measured as there were no tumorspheres detected following treatment. **d.** Representative images depicting decrease in tumorsphere number following PQR620 treatment of MB3W1 Group 3 medulloblastoma cells. Scale = 200  $\mu$ m. **e.** Quantification of total sphere number (upper) and viability (lower) following MB3W1 Group 3 tumorsphere treatment with PQR620. Data are presented as mean values  $\pm$  SEM. P=0.047. N=5 biological replicates (sphere number) and N=3 biological replicates (viability). Results were analyzed using one-way ANOVA and a Dunnett test for multiple comparisons. **f.** Reduction in pS6 following 3-hour AZD8055 treatment (25-100 nM) of HDMB03 Group 3 tumorspheres. Total S6 serves as the loading control. **g.** Primary HDMB03 tumorspheres following AZD8055 treatment for 5 days at 25-100 nM. Scale = 200  $\mu$ m. **h.** Secondary HDMB03 tumorspheres following AZD8055 treatment for 5 days at 25-100 nM. Scale = 200  $\mu$ m.

**Supplementary Table 1: List of antibodies used in the study**

| <b>ChIP antibodies</b>         |                                     |                        |
|--------------------------------|-------------------------------------|------------------------|
| Name                           | Company/Catalog number              | Concentration/dilution |
| H3K27me3                       | Millipore (07-449)                  | 10 µg                  |
| H3K4me3                        | Abcam (ab8580)                      | 5 µg                   |
| OTX2                           | Abcam (ab21990)                     | 10 µg                  |
| <b>Co-IP antibodies</b>        |                                     |                        |
| OTX2                           | Abcam (ab21990)                     | 2 µg                   |
| <b>Western blot antibodies</b> |                                     |                        |
| p-4E-BP1                       | Cell Signaling Technology (9451)    | 1/1000                 |
| Total 4E-BP1                   | Cell Signaling Technology (9644)    | 1/2000                 |
| Actin                          | Sigma-Aldrich (A2228)               | 1/1000                 |
| p-AKT                          | Cell Signaling Technology (9611)    | 1/500                  |
| Total AKT                      | Cell Signaling Technology (9272)    | 1/500                  |
| Cleaved Caspase-3              | Cell Signaling Technology (9664)    | 1/500                  |
| Doublecortin                   | Cell Signaling Technology (4604)    | 1/500                  |
| EZH2                           | Cell Signaling Technology (5246)    | 1/1000                 |
| GAPDH                          | Santa Cruz Biotechnology (sc-47724) | 1/3000                 |
| PAX3                           | Abcam (ab180754)                    | 1/500                  |

|                                          |                                         |        |
|------------------------------------------|-----------------------------------------|--------|
| PAX6                                     | ThermoFisher Scientific<br>(42-6600)    | 1/500  |
| p-Raptor                                 | Cell Signaling Technology<br>(2083)     | 1/1000 |
| Raptor                                   | Cell Signaling Technology<br>(2280)     | 1/1000 |
| Rheb                                     | Cell Signaling Technology<br>(13879)    | 1/500  |
| p-S6                                     | Cell Signaling Technology<br>(2211)     | 1/1000 |
| Total S6                                 | Cell Signaling Technology<br>(2317)     | 1/1000 |
| SOX2                                     | Cell Signaling Technology<br>(3579)     | 1/500  |
| SUZ12                                    | Cell Signaling Technology<br>(3737)     | 1/1000 |
| TUJ1                                     | R&D systems (MAB1195)                   | 1/1000 |
| <b>Western blot Secondary antibodies</b> |                                         |        |
| Goat anti-mouse HRP                      | Abcam (ab6789)                          | 1/3000 |
| Donkey anti-rabbit HRP                   | Jackson ImmunoResearch<br>(711-035-152) | 1/5000 |
| <b>IHC antibodies</b>                    |                                         |        |
| Ki67                                     | Cell Signaling Technology<br>(9449S)    | 1/800  |
| p-4E-BP1                                 | Cell Signaling Technology<br>(2855)     | 1/1000 |
| p-S6                                     | Cell Signaling Technology<br>(2211)     | 1/400  |
| PAX3                                     | DSHB (AB528426)                         | 1/400  |

|                                  |                                         |                                  |
|----------------------------------|-----------------------------------------|----------------------------------|
| PAX6                             | ThermoFisher Scientific<br>(42-6600)    | 1/150                            |
| SOX2                             | Cell Signaling Technology<br>(3579)     | 1/100                            |
| STEM121                          | Clontech (Y40410)                       | 1/500                            |
| $\beta$ III Tubulin              | R&D Systems (MAB1195)                   | 1/250                            |
| <b>IHC secondary antibodies</b>  |                                         |                                  |
| Biotin-SP sheep anti-mouse IgG   | Jackson ImmunoResearch<br>(515-065-003) | 1/500                            |
| Biotin-SP goat anti-rabbit IgG   | Jackson ImmunoResearch<br>(111-065-144) | 1/500                            |
| <b>Flow cytometry antibodies</b> |                                         |                                  |
| Annexin V                        | BD (561012)                             | As per manufacturer's guidelines |
| BrdU                             | BD (552598)                             | As per manufacturer's guidelines |

**Supplementary Table 2: List of primers used in the study**

| <b>qRT-PCR primers</b>      |                           |                         |
|-----------------------------|---------------------------|-------------------------|
|                             | Forward (5'-3')           | Reverse (5'-3')         |
| <i>GAPDH</i>                | CCATGAGAAGTATGACAACAGCC   | GGGTGCTAAGCAGTTGGTG     |
| <i>PAX3</i>                 | CAGTATGGACAAAGTGCCTTTCATT | TGCGAAGACCAGAAACAGGG    |
| <i>PAX6</i>                 | CCGGCAGAAGATTGTAGAGC      | CGTTGGACACGTTTTGATTG    |
| <b>ChIP-qRT-PCR primers</b> |                           |                         |
| <i>PAX3</i>                 | TCTCCACTCTCTTCCTACTTCA    | CCAAGAATATTCCTAGGAGCTGA |
| <i>PAX6</i>                 | AAGGGAGGGAGGAAAAGGGA      | AATGTTAATGGCTGCGGTCG    |
