# Supplementary material for: An OTX2-PAX3 signaling axis regulates Group 3 medulloblastoma cell fate
Source: PubMed Central journal article supplement — Nat Commun. 2020 Jul 20;11:3627. doi: 10.1038/s41467-020-17357-4 (PMC7371715; doi:10.1038/s41467-020-17357-4), 2020-07-20
Supplement: 41467_2020_17357_MOESM3_ESM.pdf [file 41467_2020_17357_MOESM3_ESM.pdf]

## **Description of Additional Supplementary Files**

File Name: Supplementary Data 1

Description: Transcription factors exhibiting significant changes in H3K4me3 and/or H3K27me3 marks.

File Name: Supplementary Data 2

Description: Hallmark MTORC1 Signaling in PAX3 GOF only.

File Name: Supplementary Data 3

Description: Hallmark MYC-targets in PAX6 GOF only.

File Name: Supplementary Data 4

Description: Cluster marker genes for HDMB03, D283 and MB3W1 tumorspheres.

File Name: Supplementary Data 5

Description: Pathways associated with genes exhibiting changes in the H3K4me3 mark following OTX2 silencing.

File Name: Supplementary Data 6

Description: Pathways associated with genes exhibiting changes in the H3K27me3 mark following OTX2 silencing.

File Name: Supplementary Data 7

Description: Pathways associated with genes exhibiting changes in both the H3K4me3 and H3K27me3 marks following OTX2 silencing.

File Name: Supplementary Data 8

Description: OTX2 binding at select mTORC1/EIF4/p70S6K Pathway Genes +12 kb upstream to -2 kb downstream of their TSS.
