# Supplementary material for: An OTX2-PAX3 signaling axis regulates Group 3 medulloblastoma cell fate
Source: PubMed Central journal article supplement — Nat Commun. 2020 Jul 20;11:3627. doi: 10.1038/s41467-020-17357-4 (PMC7371715; doi:10.1038/s41467-020-17357-4), 2020-07-20
Supplement: 41467_2020_17357_MOESM12_ESM.pdf [file 41467_2020_17357_MOESM12_ESM.pdf]

## Reporting Summary

Nature Research wishes to improve the reproducibility of the work that we publish. This form provides structure for consistency and transparency in reporting. For further information on Nature Research policies, see [Authors & Referees](#) and the [Editorial Policy Checklist](#).

### Statistics

For all statistical analyses, confirm that the following items are present in the figure legend, table legend, main text, or Methods section.

n/a Confirmed

- |                                     |                                     |                                                                                                                                                                                                                                                            |
|-------------------------------------|-------------------------------------|------------------------------------------------------------------------------------------------------------------------------------------------------------------------------------------------------------------------------------------------------------|
| <input type="checkbox"/>            | <input checked="" type="checkbox"/> | The exact sample size ( $n$ ) for each experimental group/condition, given as a discrete number and unit of measurement                                                                                                                                    |
| <input type="checkbox"/>            | <input checked="" type="checkbox"/> | A statement on whether measurements were taken from distinct samples or whether the same sample was measured repeatedly                                                                                                                                    |
| <input type="checkbox"/>            | <input checked="" type="checkbox"/> | The statistical test(s) used AND whether they are one- or two-sided<br><i>Only common tests should be described solely by name; describe more complex techniques in the Methods section.</i>                                                               |
| <input checked="" type="checkbox"/> | <input type="checkbox"/>            | A description of all covariates tested                                                                                                                                                                                                                     |
| <input type="checkbox"/>            | <input checked="" type="checkbox"/> | A description of any assumptions or corrections, such as tests of normality and adjustment for multiple comparisons                                                                                                                                        |
| <input type="checkbox"/>            | <input checked="" type="checkbox"/> | A full description of the statistical parameters including central tendency (e.g. means) or other basic estimates (e.g. regression coefficient) AND variation (e.g. standard deviation) or associated estimates of uncertainty (e.g. confidence intervals) |
| <input type="checkbox"/>            | <input checked="" type="checkbox"/> | For null hypothesis testing, the test statistic (e.g. $F$ , $t$ , $r$ ) with confidence intervals, effect sizes, degrees of freedom and $P$ value noted<br><i>Give <math>P</math> values as exact values whenever suitable.</i>                            |
| <input checked="" type="checkbox"/> | <input type="checkbox"/>            | For Bayesian analysis, information on the choice of priors and Markov chain Monte Carlo settings                                                                                                                                                           |
| <input checked="" type="checkbox"/> | <input type="checkbox"/>            | For hierarchical and complex designs, identification of the appropriate level for tests and full reporting of outcomes                                                                                                                                     |
| <input checked="" type="checkbox"/> | <input type="checkbox"/>            | Estimates of effect sizes (e.g. Cohen's $d$ , Pearson's $r$ ), indicating how they were calculated                                                                                                                                                         |

*Our web collection on [statistics for biologists](#) contains articles on many of the points above.*

### Software and code

Policy information about [availability of computer code](#)

|                 |                                                                                                                                                                                                                                                                                                                           |
|-----------------|---------------------------------------------------------------------------------------------------------------------------------------------------------------------------------------------------------------------------------------------------------------------------------------------------------------------------|
| Data collection | No software was used                                                                                                                                                                                                                                                                                                      |
| Data analysis   | Trimmomatic 0.36, R (v.3.5.0), Seurat (R package) (v3.0.0), DESeq2 (R package) (v1.20.0), Cell Ranger (v3.0.2), GSEA (v3.0), Cell Seek ( <a href="https://cellseek.stjude.org/cerebellum/">https://cellseek.stjude.org/cerebellum/</a> ), Partek Genomics Suite software, Prism 8.0, Cytoscape v3.7.2, P, Kaluza software |

For manuscripts utilizing custom algorithms or software that are central to the research but not yet described in published literature, software must be made available to editors/reviewers. We strongly encourage code deposition in a community repository (e.g. GitHub). See the Nature Research [guidelines for submitting code & software](#) for further information.

### Data

Policy information about [availability of data](#)

All manuscripts must include a [data availability statement](#). This statement should provide the following information, where applicable:

- Accession codes, unique identifiers, or web links for publicly available datasets
- A list of figures that have associated raw data
- A description of any restrictions on data availability

Novel ChIP-seq, RNA-seq and scRNA-seq data have all been deposited into GEO under the SuperSeries accession code GSE132558. Each dataset can be accessed separately through the following subseries: GSE132269 (ChIP-seq), GSE132506 (RNA-seq), and GSE137758 (scRNA-seq). All supportive data corresponding to the GEO files are displayed in Figures 1,3,5,6 and 7, as well as Supplementary Fig. 5-7. All other supporting data are available within the article and supplementary files. Additional publicly available datasets utilized include Ensembl GRCh38 (ChIP-seq Fig. 1), GEO accession codes GSE92585 (Fig. 3d), GSE85217 (Fig. 1 and Supplementary Figure 1), and European Genome-phenome Archive accession code EGAS00001003170 (Fig. 2a-b).

## Field-specific reporting

Please select the one below that is the best fit for your research. If you are not sure, read the appropriate sections before making your selection.

- Life sciences     Behavioural & social sciences     Ecological, evolutionary & environmental sciences

For a reference copy of the document with all sections, see [nature.com/documents/nr-reporting-summary-flat.pdf](https://www.nature.com/documents/nr-reporting-summary-flat.pdf)

## Life sciences study design

All studies must disclose on these points even when the disclosure is negative.

|                 |                                                                                                                                                                                                                                                                                                                                                                                                                                                                                                                                                                                                                                                                                                                                                                                                                                                                             |
|-----------------|-----------------------------------------------------------------------------------------------------------------------------------------------------------------------------------------------------------------------------------------------------------------------------------------------------------------------------------------------------------------------------------------------------------------------------------------------------------------------------------------------------------------------------------------------------------------------------------------------------------------------------------------------------------------------------------------------------------------------------------------------------------------------------------------------------------------------------------------------------------------------------|
| Sample size     | No power calculations were utilized to determine required sample size for in vitro and in vivo experiments. For in vivo studies, sample size was determined based on availability of animals and cost of the drug. For in vitro studies, all experiments were performed on a minimum of 3 independent biological replicates for each cell line with the majority of cell culture-based assays also being repeated with an additional 1-2 independent cell lines accordingly. For patient sample transcriptome, proteome, single cell RNA seq and IHC studies, sample size was based on the number of samples already present in publicly available datasets or made available to the lab through collaboration.                                                                                                                                                             |
| Data exclusions | For Figure 7d, two animals in the 50 mg/kg group were removed from the study as they died during oral gavage treatment due to tracheal injuries. Pre-established exclusion criteria included animals that die during oral gavage treatment due to tracheal injuries or develop any severe health issues unrelated to tumor growth that require euthanasia during the course of the experiment.                                                                                                                                                                                                                                                                                                                                                                                                                                                                              |
| Replication     | For vitro/molecular experiments (ie. tumorsphere assays, qPCR, ChIP-qPCR, bulk RNA sequencing), studies were carried out in 3 or greater independent biological replicates for each cell line with the majority also being replicated in 1-2 additional cell lines for reproducibility. All statistics were performed on independent biological replicates. Single cell RNA sequencing was performed on tumorspheres derived from 3 biologically independent Group 3 MB cell lines and data from individual cell lines was compared to results obtained from integrating the 3 datasets. Slides from multiple control and treatment group tumor sections were stained for IHC and representative images shown. In vivo studies for PAX3 and PAX6 overexpressing cells were performed twice, and in vivo PQR620 treatment studies were performed on 3 sets of NOD SCID mice. |
| Randomization   | Following intracerebellar transplantation, NOD SCID mice were randomly distributed into groups for drug treatment in Figure 7. For all other experiments, cells/samples were randomly assigned into groups.                                                                                                                                                                                                                                                                                                                                                                                                                                                                                                                                                                                                                                                                 |
| Blinding        | Blinding was performed during MRI imaging and tissue preparation for IHC. For tumorsphere experiments, measurements were performed by 2 independent observers to minimize bias and ensure reproducibility. Remaining studies were not blinded but replicated as described above and/or repeated in 1-2 additional cell lines.                                                                                                                                                                                                                                                                                                                                                                                                                                                                                                                                               |

## Reporting for specific materials, systems and methods

We require information from authors about some types of materials, experimental systems and methods used in many studies. Here, indicate whether each material, system or method listed is relevant to your study. If you are not sure if a list item applies to your research, read the appropriate section before selecting a response.

### Materials & experimental systems

| n/a                                 | Involvement in the study                                        |
|-------------------------------------|-----------------------------------------------------------------|
| <input type="checkbox"/>            | <input checked="" type="checkbox"/> Antibodies                  |
| <input type="checkbox"/>            | <input checked="" type="checkbox"/> Eukaryotic cell lines       |
| <input checked="" type="checkbox"/> | <input type="checkbox"/> Palaeontology                          |
| <input type="checkbox"/>            | <input checked="" type="checkbox"/> Animals and other organisms |
| <input type="checkbox"/>            | <input checked="" type="checkbox"/> Human research participants |
| <input checked="" type="checkbox"/> | <input type="checkbox"/> Clinical data                          |

### Methods

| n/a                      | Involvement in the study                                   |
|--------------------------|------------------------------------------------------------|
| <input type="checkbox"/> | <input checked="" type="checkbox"/> ChIP-seq               |
| <input type="checkbox"/> | <input checked="" type="checkbox"/> Flow cytometry         |
| <input type="checkbox"/> | <input checked="" type="checkbox"/> MRI-based neuroimaging |

## Antibodies

### Antibodies used

The following antibodies were used in this study (epitope, experimental procedure, company, catalog number, lot number, concentration/dilution):

H3K27me3, ChIP-sequencing, Millipore, 07-449, 2919706, 10ug  
 H3K4me3, ChIP-sequencing, Abcam, ab8580, N/A, 5 ug  
 OTX2, ChIP/ChIP-sequencing, Abcam, ab21990, N/A, 10 ug  
 OTX2, immunoblotting, Abcam, ab21990, N/A, 1/500  
 OTX2, immunoprecipitation, Proteintech, 13497-1-AP, N/A, 1/500  
 p-4E-BP1, immunoblotting, Cell Signaling Technology, 9451, N/A, 1/1000

p-4E-BP1, IHC, Cell Signaling Technology, 2855, N/A, 1/1000  
 Total 4E-BP1, immunoblotting, Cell Signaling Technology, 9644, N/A, 1/2000  
 Beta actin, immunoblotting, Sigma-Aldrich, A2228, N/A, 1/1000  
 p-AKT, immunoblotting, Cell Signaling Technology, 9611, N/A, 1/500  
 AKT, immunoblotting, Cell Signaling Technology, 9272, N/A, 1/500  
 Cleaved Caspase-3, Cell Signaling Technology, 9664, N/A, 1/500  
 Doublecortin, immunoblotting, Cell Signaling Technology, 4604, N/A, 1/500  
 EZH2, immunoblotting, Cell Signaling Technology, 5246, N/A, 1/1000  
 GAPDH, immunoblotting, Santa Cruz Biotechnology, sc-47724, 1/3000  
 PAX3, Immunoblotting, Abcam, ab180754, N/A, 1/500  
 PAX3, IHC, Developmental Studies Hybridoma Bank, AB528426, N/A, 1/400  
 PAX6, immunoblotting, ThermoFisher Scientific, 42-6600, N/A, 1/500  
 PAX6, IHC, ThermoFisher Scientific, 42-6600, N/A, 1/150  
 p-Raptor, immunoblotting, Cell Signaling Technology, 2083, N/A, 1/1000  
 Raptor, immunoblotting, Cell Signaling Technology, 2280, N/A, 1/1000  
 Rheb, immunoblotting, Cell Signaling Technology, 13879, N/A, 1/500  
 p-S6, immunoblotting, Cell Signaling Technology, 2211, N/A, 1/1000  
 p-S6, IHC, Cell Signaling Technology, 2211 N/A, 1/400  
 Total S6, immunoblotting, Cell Signaling Technology, 2317, N/A, 1/1000  
 SOX2, immunoblotting, Cell Signaling Technology, 3579, N/A, 1/500  
 STEM121, IHC, Clontech, Y40410, N/A, 1/100  
 SUZ12, immunoblotting, Cell Signaling Technology, 3737, N/A, 1/1000  
 TUJ1, immunoblotting and IHC, R&D Systems, MAB1195, HGQ0116081, 1/1000 and 1/250 for IHC  
 Ki67, IHC, Cell Signaling Technology, 9449, N/A, 1/800  
 Annexin V, Flow cytometry, BD Biosciences, 561012, N/A, as per manufacturer's guidelines  
 BrdU, flow cytometry, BD Biosciences, 552598, N/A, as per manufacturer's guidelines  
 Biotin-SP sheep anti-mouse IgG, IHC, Jackson ImmunoResearch, 515-065-003, N/A, 1/500  
 Biotin-SP goat anti-rabbit IgG, IHC, Jackson ImmunoResearch, 111-065-144, N/A, 1/500  
 Goat anti-mouse HRP, immunoblotting, Abcam, ab6789, N/A, 1/3000  
 Donkey anti-rabbit HRP, immunoblotting, Jackson ImmunoResearch, 711-035-152, N/A, 1/5000

## Validation

H3K27me3 (07-449) antibody underwent dot blot testing for trimethylated lysine 27 specificity and validated by IP.  
 H3K4me3 (ab8580) antibody is tested in peptide arrays where specific recognition to the H3K4 modification was observed.  
 Manufacturer tested applications include ChIP and ChIP-seq.  
 OTX2 (ab21990) manufacturer tested applications include ChIP  
 OTX2 (13497-1-AP) antibody underwent KD/KO validation and was tested for IP with Y79 lysates by the manufacturers.  
 p-4E-BP1 (9451), Total 4E-BP1 (9644), p-AKT (9611), AKT (9272), Cleaved Caspase-3 (9664), Doublecortin (4604), EZH2 (5246), p-Raptor (2083), Raptor (2280), Rheb (13879), p-S6 (2211), total S6 (2317), Sox2 (3579), Suz12 (3737), antibodies are validated according to Cell Signaling Technologies Hallmarks of Antibody Validation™ which for immunoblotting may include KD/KO validation, validation across several cell lines/tissues, etc.  
 p-4E-BP1 (2855), p-S6 (2211) and Ki-67 (9449) antibodies are validated according to Cell Signaling Technologies Hallmarks of Antibody Validation™ which for IHC may include staining with the use of blocking peptides, staining on human cancer tissue arrays, etc.  
 GAPDH (516214) has been tested in immunoblotting by the manufacturers.  
 PAX3 (ab180754) antibody has been tested in immunoblotting by the manufacturers.  
 PAX3 (AB528426) antibody has been used for IHC in a number of publications including: 1. Lang D, et al., "Pax3 functions at a nodal point in melanocyte stem cell differentiation". Nature 433.7028 (2005 Feb 24): 884-7; 2. Medic and Zinman, "PAX3 expression in normal skin melanocytes and melanocytic lesions (naevi and melanomas)", PloS one 5.4 (2010 Apr 22): e9977.  
 PAX6 (42-6600) antibody was validated by knockdown by the manufacturers.  
 Stem121 (Y40410) antibody has been widely used for detection of human cell engraftment: Kelly S, et al . "Transplanted human fetal neural stem cells survive, migrate, and differentiate in ischemic rat cerebral cortex". PNAS . (2004) 101: 11839-11844.; 2. Cummings BJ, et al . "Human neural stem cells differentiate and promote locomotor recovery in spinal cord-injured mice". PNAS. (2005) 102: 14069-14074.; 3. Tamaki SJ, et al . "Neuroprotection of host cells by human central nervous system stem cells in a mouse model of infantile neuronal ceroid lipofuscinosis". Cell Stem Cell. (2009) 5: 310-319.; 4. Kallur T, et al . "Human fetal cortical and striatal neural stem cells generate region-specific neurons in vitro and differentiate extensively to neurons after intrastriatal transplantation in neonatal rats" . J Neurosci Res. (2006) 84:1630-1644. ; 5.SalazarDL,etal. "Human neural stem cells differentiate and promote locomotor recovery in an early chronic spinal cord injury NOD-scid mouse model" .PLoS ONE. (2010) 5:e12272.  
 BIII tubulin (Tuj1) (MAB1195) has been tested for immunoblots in human and mouse neural tissue by the manufacturers.  
 Annexin V (561012) and BrdU (552598) were titrated by investigators to attain the appropriate concentrations.

## Eukaryotic cell lines

Policy information about [cell lines](#)

|                                                                      |                                                                                                                                                                                                                                                                                  |
|----------------------------------------------------------------------|----------------------------------------------------------------------------------------------------------------------------------------------------------------------------------------------------------------------------------------------------------------------------------|
| Cell line source(s)                                                  | D283 was purchased from the American Type Culture Collection (ATCC, Rockville, MD, USA)<br>HDMB03 was kindly provided by Dr. Till Milde (Milde T, et al., Journal of Neuro-oncology, 2012)<br>MB3W1 was kindly provided by Dr. Matthias Wöfl (Dietl S, et al., BMC cancer, 2016) |
| Authentication                                                       | All cell lines have been authenticated by STR profiling (ATCC)                                                                                                                                                                                                                   |
| Mycoplasma contamination                                             | Cell lines were not tested for Mycoplasma contamination                                                                                                                                                                                                                          |
| Commonly misidentified lines<br>(See <a href="#">ICLAC</a> register) | No cell lines utilized in our study are listed in the ICLAC register                                                                                                                                                                                                             |

## Animals and other organisms

Policy information about [studies involving animals](#); [ARRIVE guidelines](#) recommended for reporting animal research

|                         |                                                                                                        |
|-------------------------|--------------------------------------------------------------------------------------------------------|
| Laboratory animals      | NOD-SCID male mice aged 7-9 weeks were utilized for all in orthotopic xenograft in vivo analysis.      |
| Wild animals            | Our study did not utilize wild animals                                                                 |
| Field-collected samples | Our study did not involve field-collected samples                                                      |
| Ethics oversight        | All in vivo procedures were approved by the University of Manitoba Animal Care Committee (AUP-17-008). |

Note that full information on the approval of the study protocol must also be provided in the manuscript.

## Human research participants

Policy information about [studies involving human research participants](#)

|                            |                                                                                                                                                                                                                                                                                                                                                              |
|----------------------------|--------------------------------------------------------------------------------------------------------------------------------------------------------------------------------------------------------------------------------------------------------------------------------------------------------------------------------------------------------------|
| Population characteristics | These data are based on the samples collected in 2 recently published studies:<br>1. Cavalli et al., Cancer Cell 2017 Jun 12;31(6):737-754.e6. doi: 10.1016/j.ccell.2017.05.005<br>2. Vladiou et al., Nature, 2019 Aug;572(7767):67-73. doi: 10.1038/s41586-019-1158-7. Epub 2019 May 1.<br>See these studies for all details regarding patient populations. |
| Recruitment                | All medulloblastoma samples were collected at diagnosis after obtaining informed consent from subjects as part of the Medulloblastoma Advanced Genomics International Consortium. Approval was obtained from institutional research ethics boards at all contributing institutions (Cavalli et al, 2017; Vladiou et al., Nature, 2019)                       |
| Ethics oversight           | See 2 published studies above for all details.                                                                                                                                                                                                                                                                                                               |

Note that full information on the approval of the study protocol must also be provided in the manuscript.

## ChIP-seq

### Data deposition

- Confirm that both raw and final processed data have been deposited in a public database such as [GEO](#).
- Confirm that you have deposited or provided access to graph files (e.g. BED files) for the called peaks.

|                                                                    |                                                                                                                                                                |
|--------------------------------------------------------------------|----------------------------------------------------------------------------------------------------------------------------------------------------------------|
| Data access links<br><i>May remain private before publication.</i> | <a href="https://www.ncbi.nlm.nih.gov/geo/query/acc.cgi?acc=GSE132269">https://www.ncbi.nlm.nih.gov/geo/query/acc.cgi?acc=GSE132269</a>                        |
| Files in database submission                                       | GSE132269_diffrepsH3K27me3.hotspot.txt.gz<br>GSE132269_diffrepsH3K27me3.txt.gz<br>GSE132269_diffrepsH3K4me3.hotspot.txt.gz<br>GSE132269_diffrepsH3K4me3.txt.gz |

Genome browser session  
(e.g. [UCSC](#))

Provide a link to an anonymized genome browser session for "Initial submission" and "Revised version" documents only, to enable peer review. Write "no longer applicable" for "Final submission" documents.

## Methodology

Replicates

one replicate of each condition:

GSM3855384 H3K4me3OTX2high  
GSM3855385 H3K4me3OTX2low  
GSM3855386 H3K27me3OTX2high  
GSM3855387 H3K27me3OTX2low  
GSM3855388 OTX2low (input control)  
GSM3855389 OTX2high (input control)

Sequencing depth

Single end 75bp reads:

H3K27me3OTX2high: 79587453 total, 55830223 uniquely mapped  
H3K27me3OTX2low: 83779457 total, 55101562 uniquely mapped  
H3K4me3OTX2high: 53158040 total, 38592295 uniquely mapped  
H3K4me3OTX2low: 44076908 total, 29747824 uniquely mapped  
OTX2high: 96361808 total, 72228795 uniquely mapped  
OTX2low: 60765131 total, 44855374 uniquely mapped

Antibodies

H3K27me3, Millipore, catalog number 07-449, lot number 2919706  
H3K4me3, Abcam, catalog number ab8580  
OTX2, Abcam, catalog number ab21990

Peak calling parameters

#note genome name hg19 is used in both of these as a required argument, diffreps does not directly support hg38 so the hg19 argument was used for genome length estimation only.

```
diffReps.pl --treatment H3K27me3OTX2high_trimmed_sorted_dedup.bed --control
H3K27me3OTX2low_trimmed_sorted_dedup.bed --btr OTX2high_trimmed_sorted_dedup.bed --bco
OTX2low_trimmed_sorted_dedup.bed --mode block --gname=hg19 --meth gt --nproc 8 --report diffrepsH3K27me3
```

```
diffReps.pl --treatment H3K4me3OTX2high_trimmed_sorted_dedup.bed --control
H3K4me3OTX2low_trimmed_sorted_dedup.bed --btr OTX2high_trimmed_sorted_dedup.bed --bco
OTX2low_trimmed_sorted_dedup.bed --mode peak --meth gt --gname=hg19 --nproc 8 --report diffrepsH3K4me3
```

Specifics for Supplementary Dataset 1 are as follows:

- Counts of MACS2 peaks associated with -5kb to +2kb regions around the TSS and gene bodies for H3K4me3 and H3K27me3 respectively.
- Count of MACS2 OTX2 peaks associated with -5kb to +2kb regions around the TSS.
- The most significant diffReps peaks adjusted pvalue and fold change associated with -5kb to +2kb regions around the TSS and gene bodies for H3K4me3 and H3K27me3 respectively.
- FPKM and count values for reads in -5kb to +2kb regions around the TSS and gene bodies for H3K4me3 and H3K27me3 respectively.
- Indication of membership in neuronal and axon associated genes, association of genes with Gene Ontology terms GO:0003677 (DNA binding), GO:0003700 (DNA-binding transcription factor activity)

Data quality

FASTQC analysis was performed  
Mapping statistics were determined

Software

ChIP-Sequencing reads were trimmed using Trimmomatic 0.36. The resulting trimmed sequences were mapped to GRCh38 using bowtie2 2.3.3.1. Histone differential peak analysis was performed using diffReps G-test comparisons were performed in "block" mode for H3K27me3 and in "peak" mode for H3K4me3, utilizing the OTX2 high and low input samples treatment group backgrounds.

## Flow Cytometry

### Plots

Confirm that:

- The axis labels state the marker and fluorochrome used (e.g. CD4-FITC).
- The axis scales are clearly visible. Include numbers along axes only for bottom left plot of group (a 'group' is an analysis of identical markers).
- All plots are contour plots with outliers or pseudocolor plots.
- A numerical value for number of cells or percentage (with statistics) is provided.

## Methodology

|                           |                                                                                                                                                                                                                                                                                                                                                                                                                                                                                                                                                                            |
|---------------------------|----------------------------------------------------------------------------------------------------------------------------------------------------------------------------------------------------------------------------------------------------------------------------------------------------------------------------------------------------------------------------------------------------------------------------------------------------------------------------------------------------------------------------------------------------------------------------|
| Sample preparation        | BrDU incorporation was analysed using a BD Pharmingen BrdU Flow Kit (BrDU-APC) (BD Biosciences) according to manufacturer's instructions as previously described (Liang et al., Cancer Research, 2018) in PAX GOF tumorspheres grown for 72 hours in stem cell conditions. The Annexin V Apoptosis Detection Kit (Annexin V-APC) (BD Biosciences) was used to evaluate cell death as previously described (Liang et al., Cancer Research, 2018). In both cases, tumorsphere populations were dissociated using Accutase into single cell suspensions for further analyses. |
| Instrument                | MoFlo XDP cell sorter (Beckman Coulter, Mississauga, ON, Canada)                                                                                                                                                                                                                                                                                                                                                                                                                                                                                                           |
| Software                  | Kaluza software (Beckman Coulter)                                                                                                                                                                                                                                                                                                                                                                                                                                                                                                                                          |
| Cell population abundance | Cell sorting was not performed in these studies, only analytical studies by flow cytometry.                                                                                                                                                                                                                                                                                                                                                                                                                                                                                |
| Gating strategy           | For BrDU and Annexin V staining, "dead/dying" cells were not gated out, as they were included in the analysis. For BrDU incorporation, gates were set based on the 7AAD only negative control to determine the G0/G1, S, and G2-M gate delineations. For Annexin V, gates were set based on 1. unstained controls. and 2. 7AAD only without Annexin V staining. Plots depicting gating strategy are included in Figure 4 of the manuscript.                                                                                                                                |

Tick this box to confirm that a figure exemplifying the gating strategy is provided in the Supplementary Information.

## Magnetic resonance imaging

### Experimental design

|                                 |                |
|---------------------------------|----------------|
| Design type                     | Resting state  |
| Design specifications           | Not applicable |
| Behavioral performance measures | Not applicable |

### Acquisition

|                               |                                                                                                                                                                                                                                              |
|-------------------------------|----------------------------------------------------------------------------------------------------------------------------------------------------------------------------------------------------------------------------------------------|
| Imaging type(s)               | Structural                                                                                                                                                                                                                                   |
| Field strength                | 7 Tesla                                                                                                                                                                                                                                      |
| Sequence & imaging parameters | Fast spin echo T1, FOV 30 x 30 mm, matrix 512x 256, TR= 1000ms, TE=11ms, FA=90, coronal slice, 0.3mm slice thickness<br>Fast spin echo T2, FOV 30 x 30 mm, matrix 256x 245, TR= 5000ms, TE=45ms, FA=90, coronal slice, 0.3mm slice thickness |
| Area of acquisition           | Whole brain                                                                                                                                                                                                                                  |
| Diffusion MRI                 | <input type="checkbox"/> Used <input checked="" type="checkbox"/> Not used                                                                                                                                                                   |

### Preprocessing

|                            |                |
|----------------------------|----------------|
| Preprocessing software     | Not applicable |
| Normalization              | Not applicable |
| Normalization template     | Not applicable |
| Noise and artifact removal | Not applicable |
| Volume censoring           | Not applicable |

### Statistical modeling & inference

|                                                                           |                                                                                                                  |
|---------------------------------------------------------------------------|------------------------------------------------------------------------------------------------------------------|
| Model type and settings                                                   | Not applicable                                                                                                   |
| Effect(s) tested                                                          | Not applicable                                                                                                   |
| Specify type of analysis:                                                 | <input checked="" type="checkbox"/> Whole brain <input type="checkbox"/> ROI-based <input type="checkbox"/> Both |
| Statistic type for inference<br>(See <a href="#">Eklund et al. 2016</a> ) | Not applicable                                                                                                   |
| Correction                                                                | Not applicable                                                                                                   |

## Models & analysis

- |                                     |                                                                       |
|-------------------------------------|-----------------------------------------------------------------------|
| n/a                                 | Involvement in the study                                              |
| <input checked="" type="checkbox"/> | <input type="checkbox"/> Functional and/or effective connectivity     |
| <input checked="" type="checkbox"/> | <input type="checkbox"/> Graph analysis                               |
| <input checked="" type="checkbox"/> | <input type="checkbox"/> Multivariate modeling or predictive analysis |
