# Supplementary material for: An OTX2-PAX3 signaling axis regulates Group 3 medulloblastoma cell fate
Source: PubMed Central journal article supplement — Nat Commun. 2020 Jul 20;11:3627. doi: 10.1038/s41467-020-17357-4 (PMC7371715; doi:10.1038/s41467-020-17357-4), 2020-07-20
Supplement: 41467_2020_17357_MOESM13_ESM.pdf [file 41467_2020_17357_MOESM13_ESM.pdf]

Figure 1b

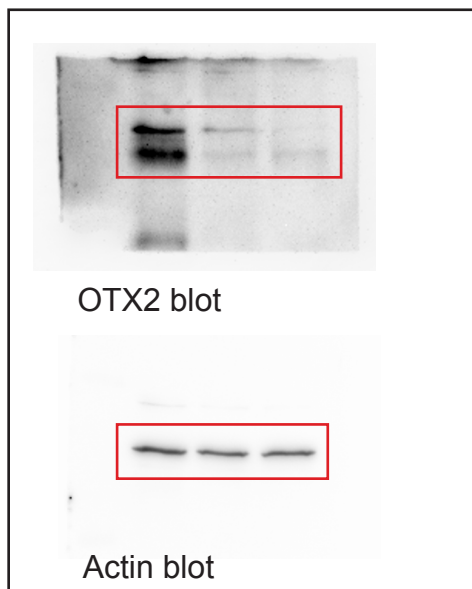

Figure 3e

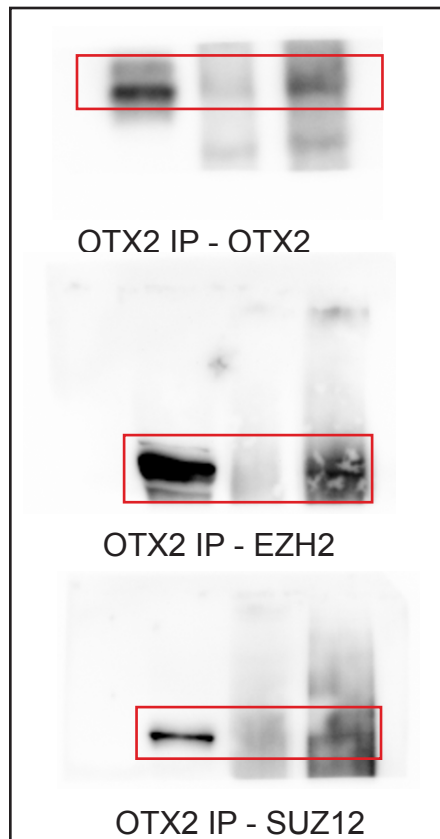

Figure 3f - D283

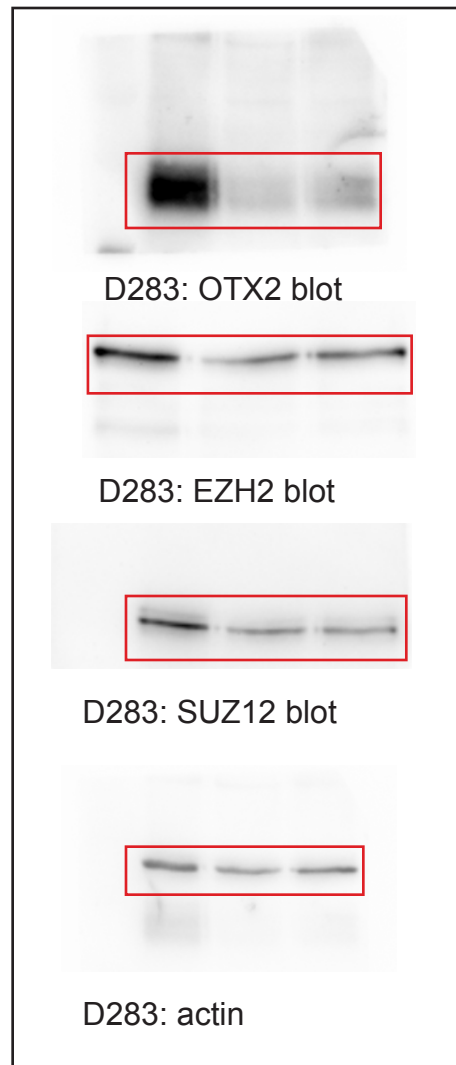

Figure 3f - HDMB03

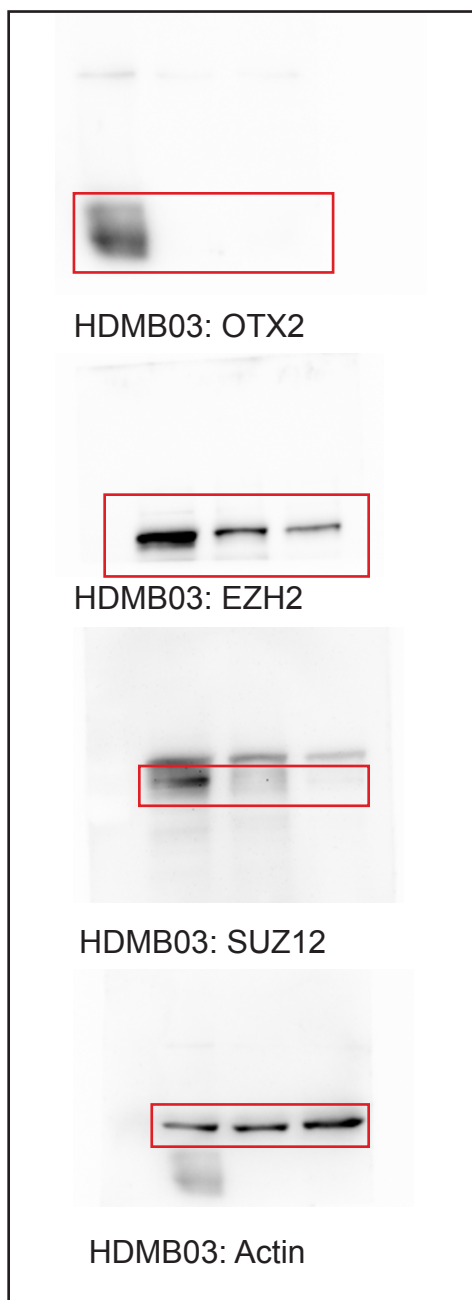

Figure 3f - MB3W1

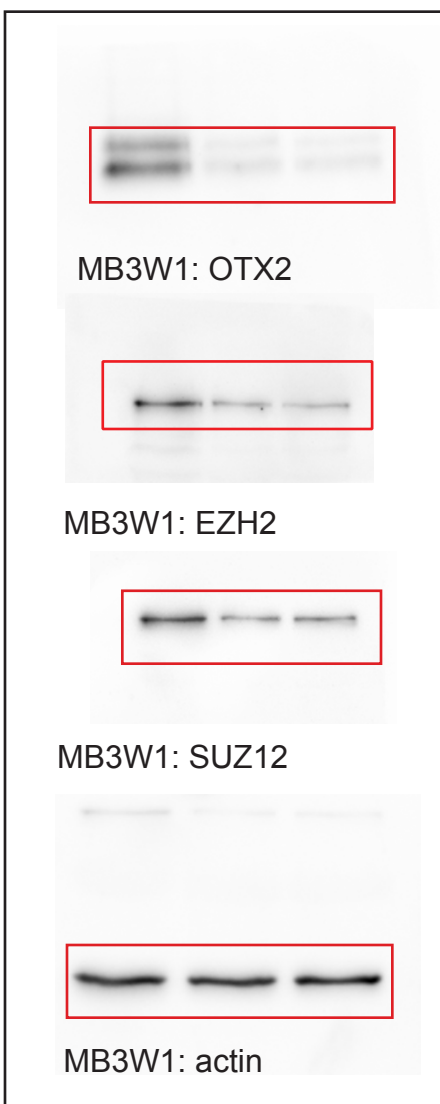

Figure 3h - D283

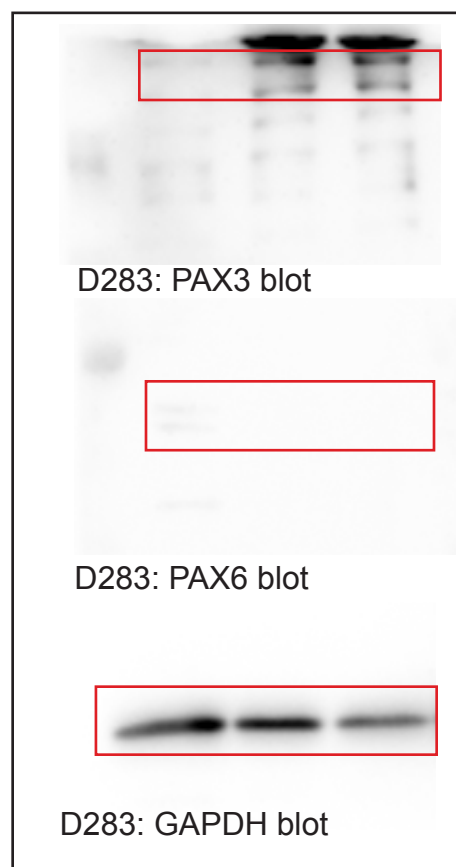

Figure 3h - HDMB03

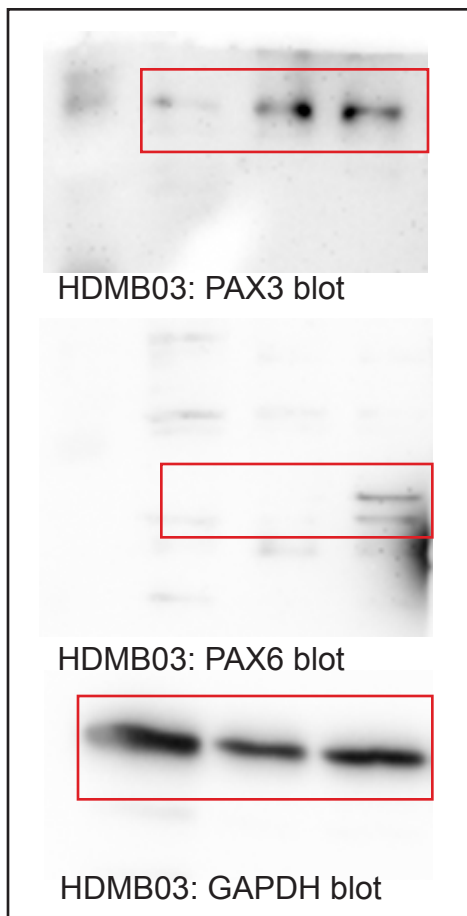

Figure 4b

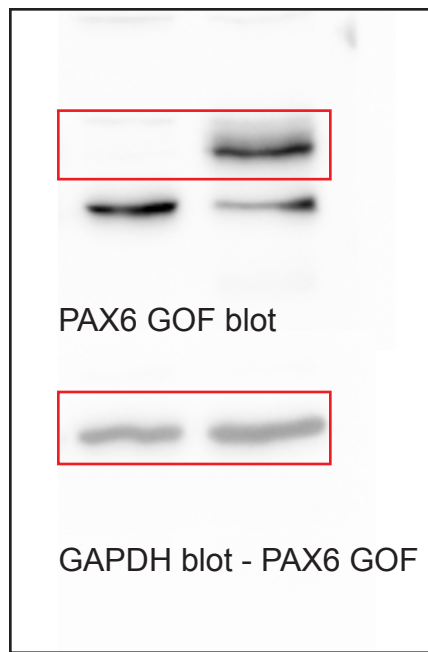

Figure 4i

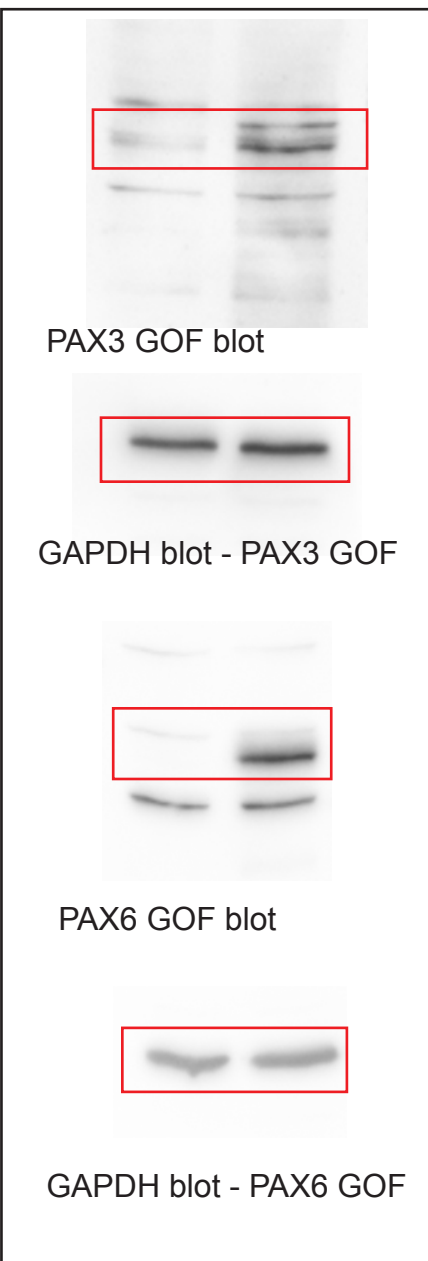

Figure 4a

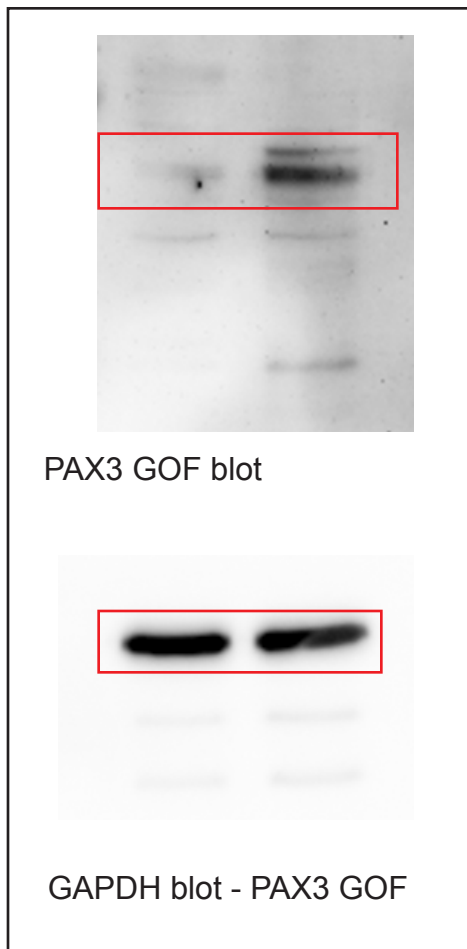

Figure 5g

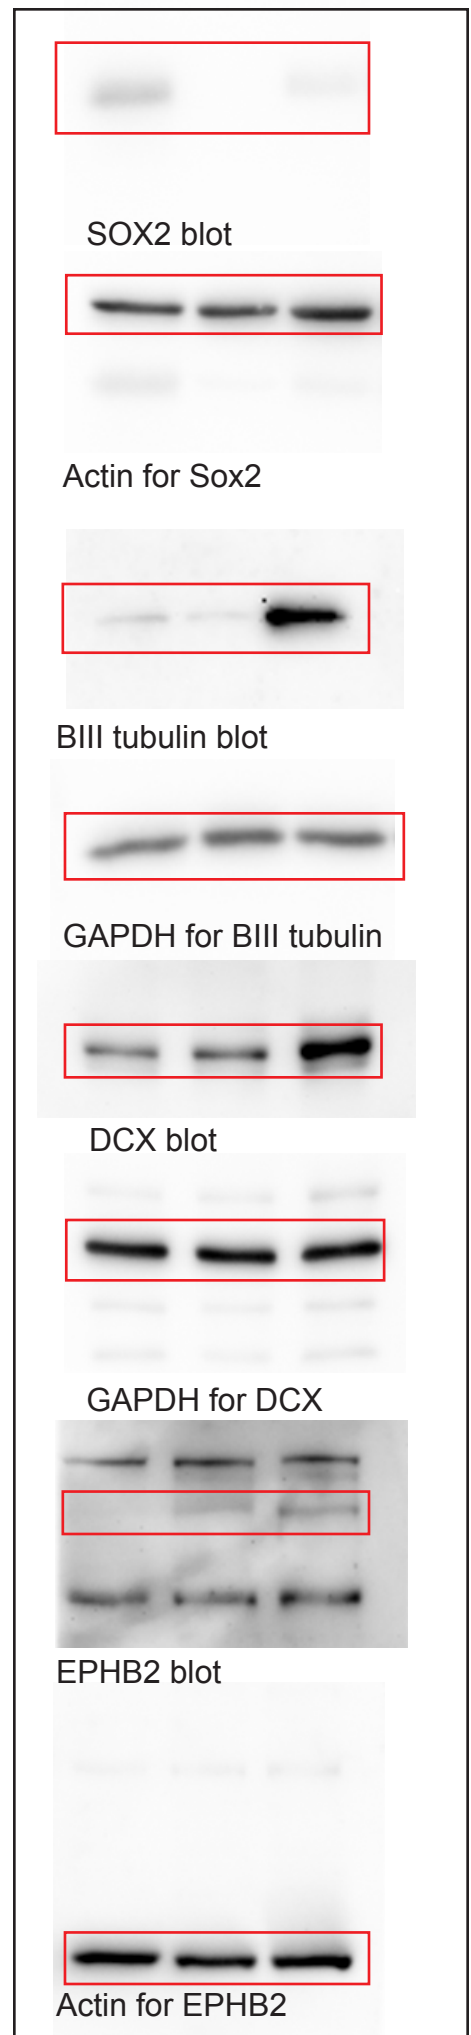

Figure 5h

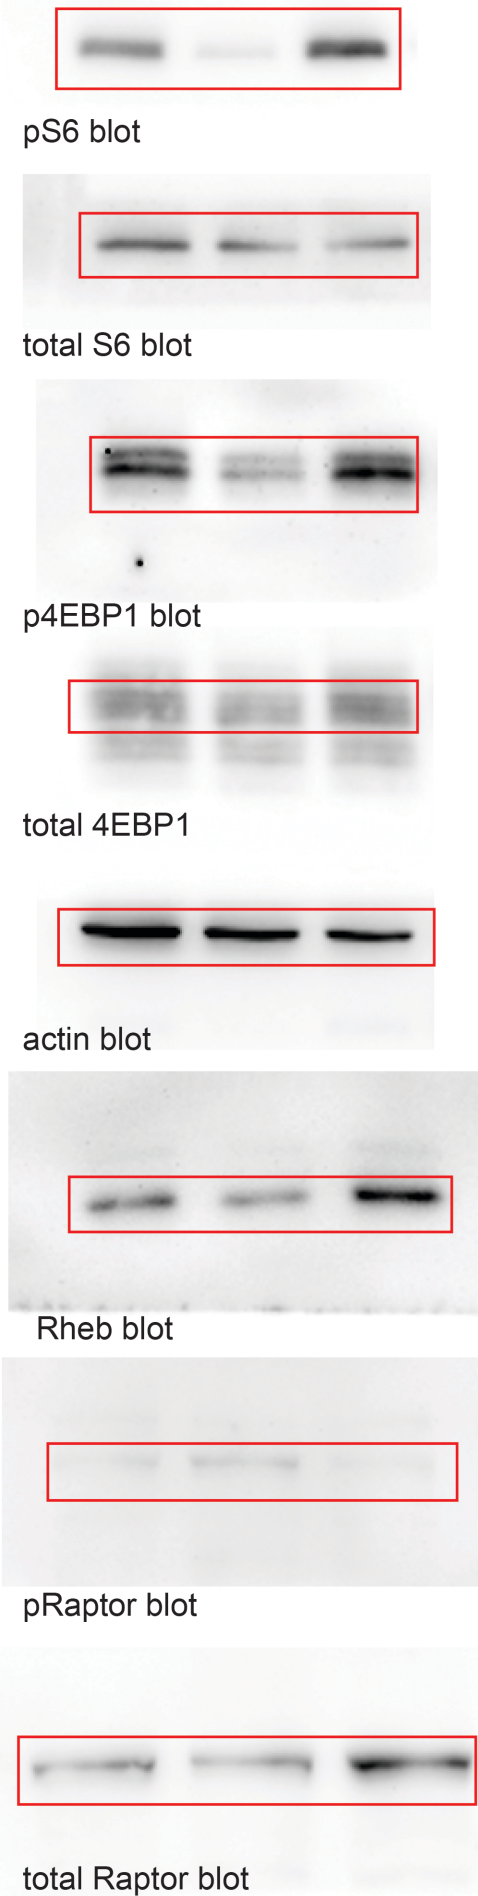

Figure 7d

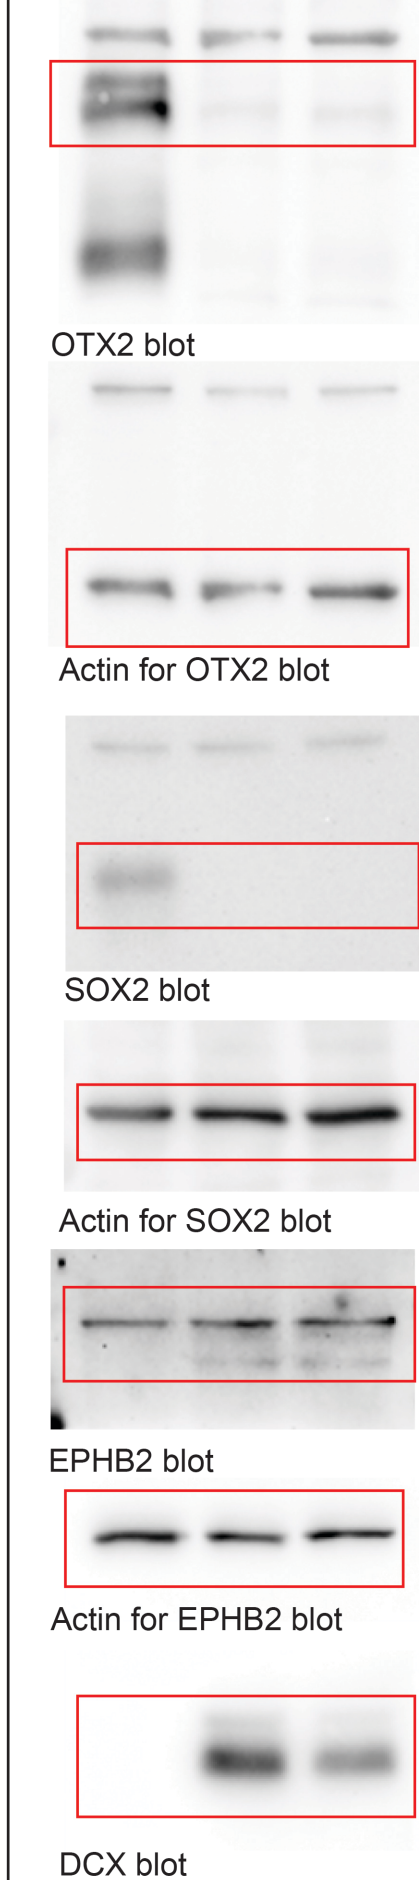

Figure 7d - continued

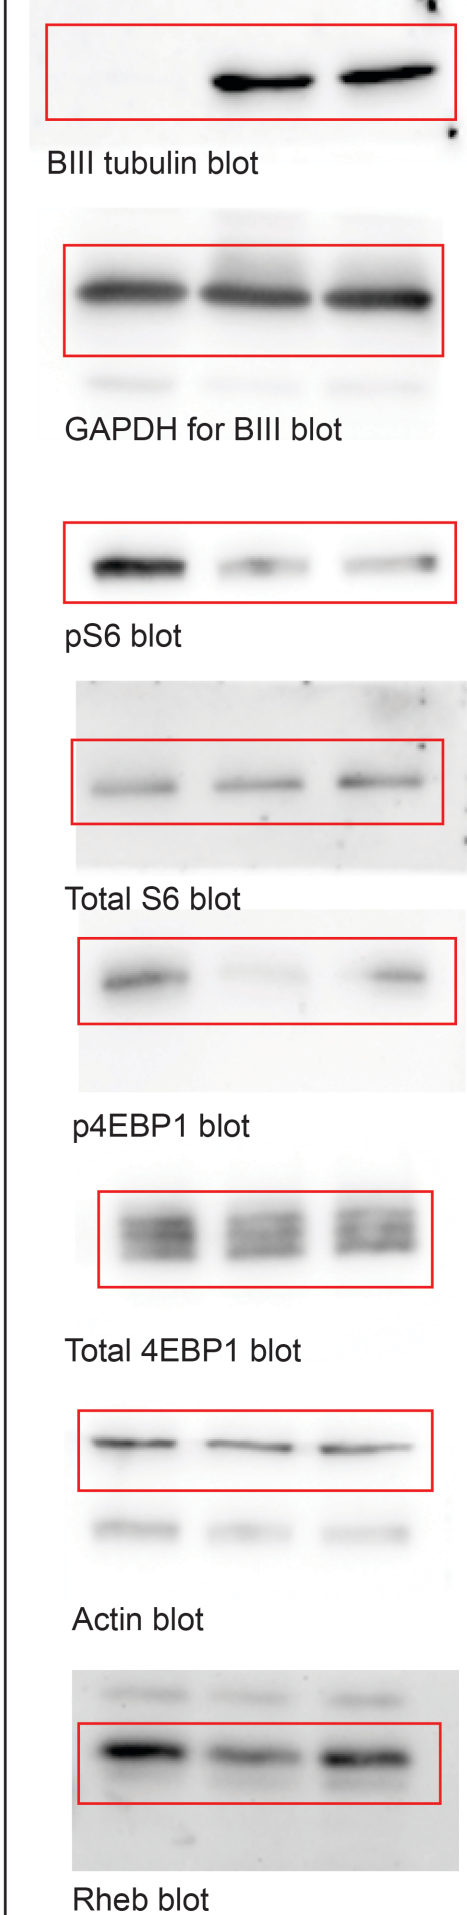

Figure 7d - continued

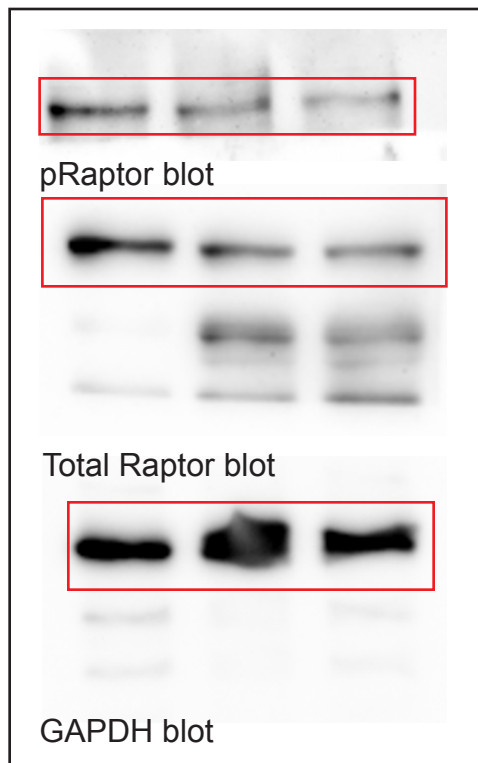

Figure 7e - continued

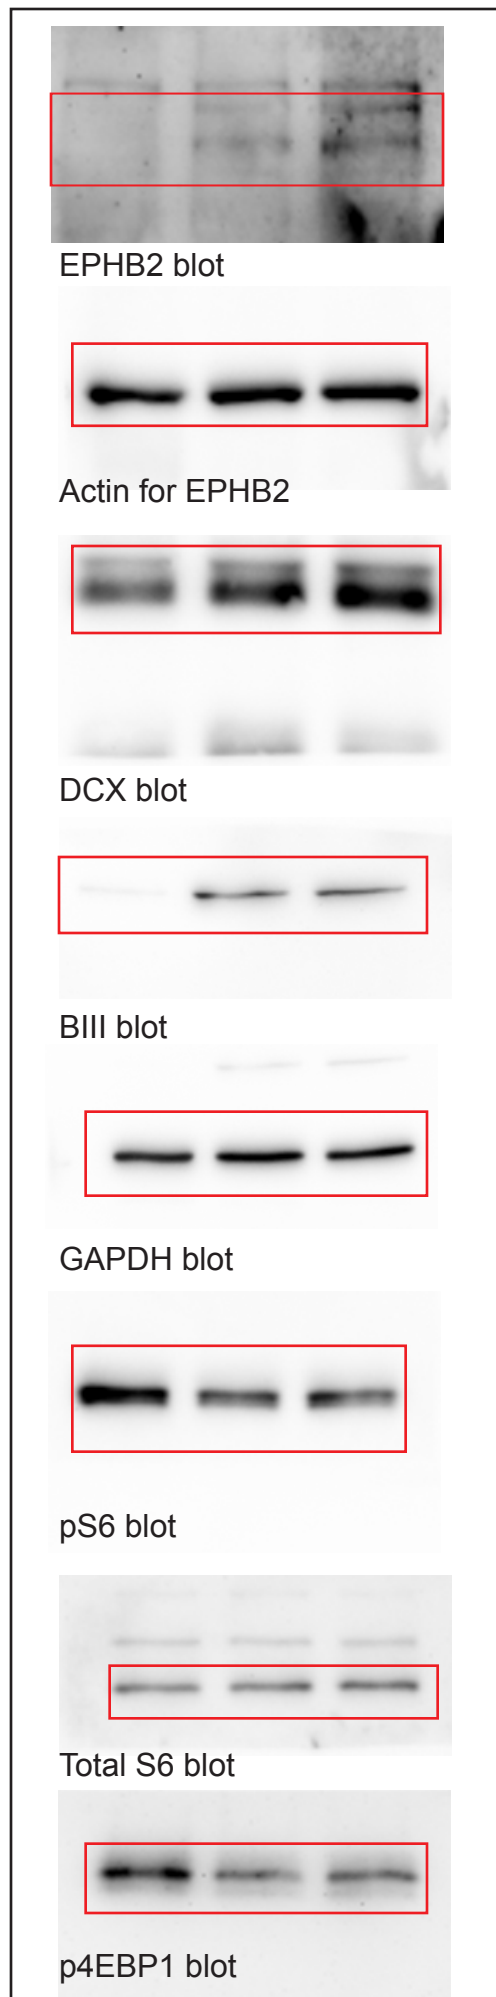

Figure 7e - continued

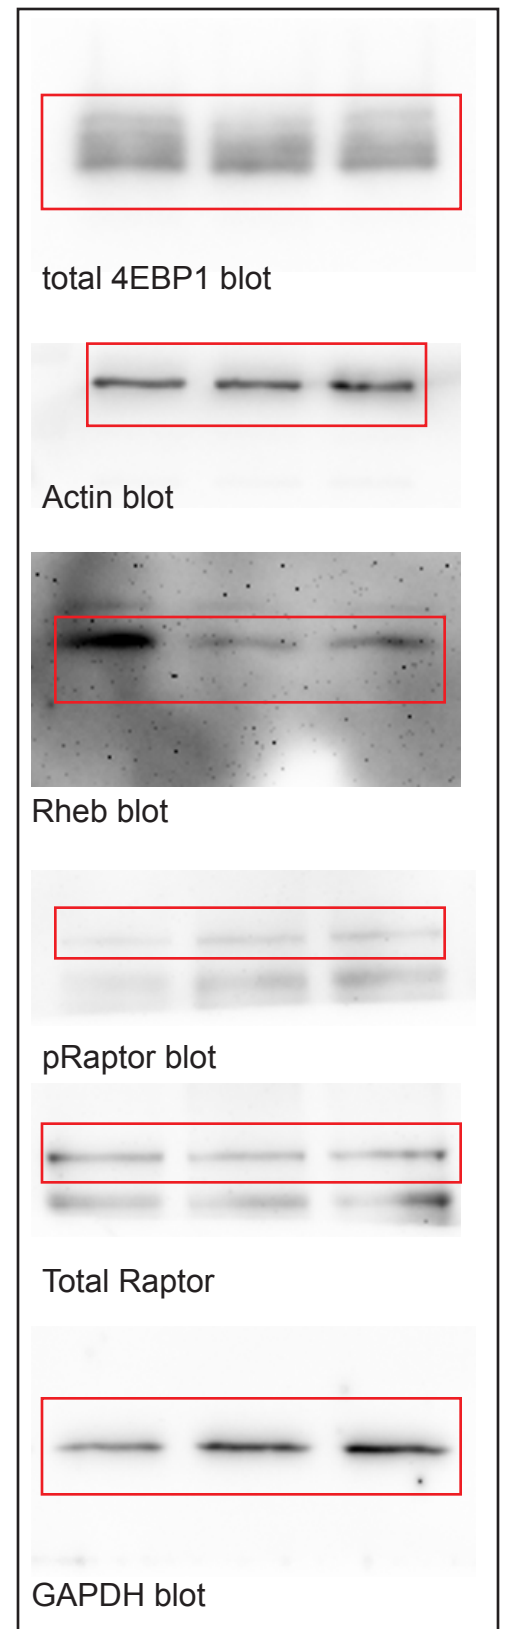

Figure 7e

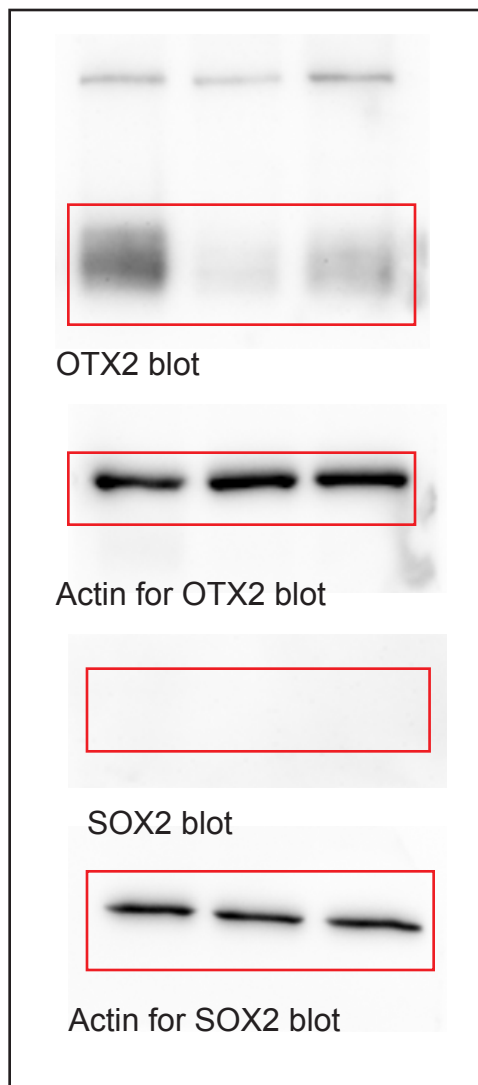

Figure 8a - HDMB03

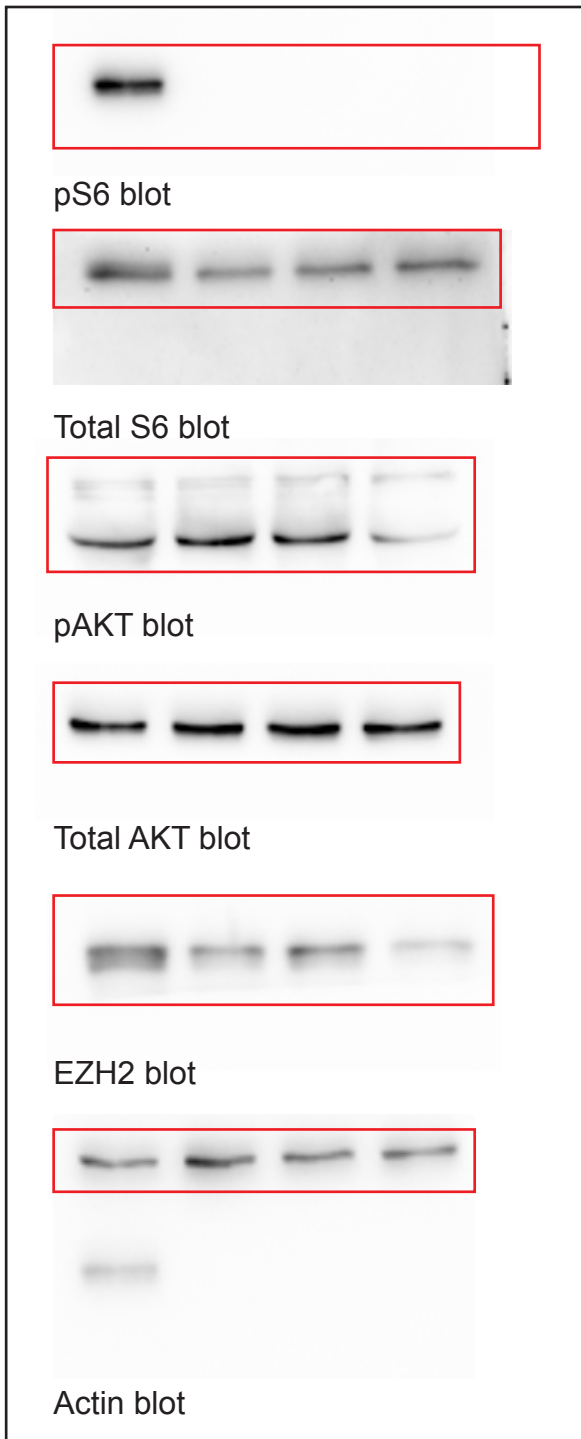

Figure 8a - MB3W1

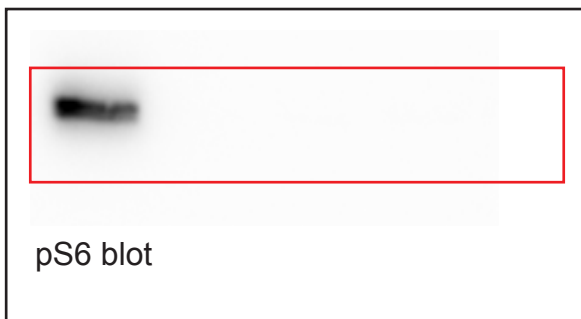

Figure 8a -MB3W1 continued

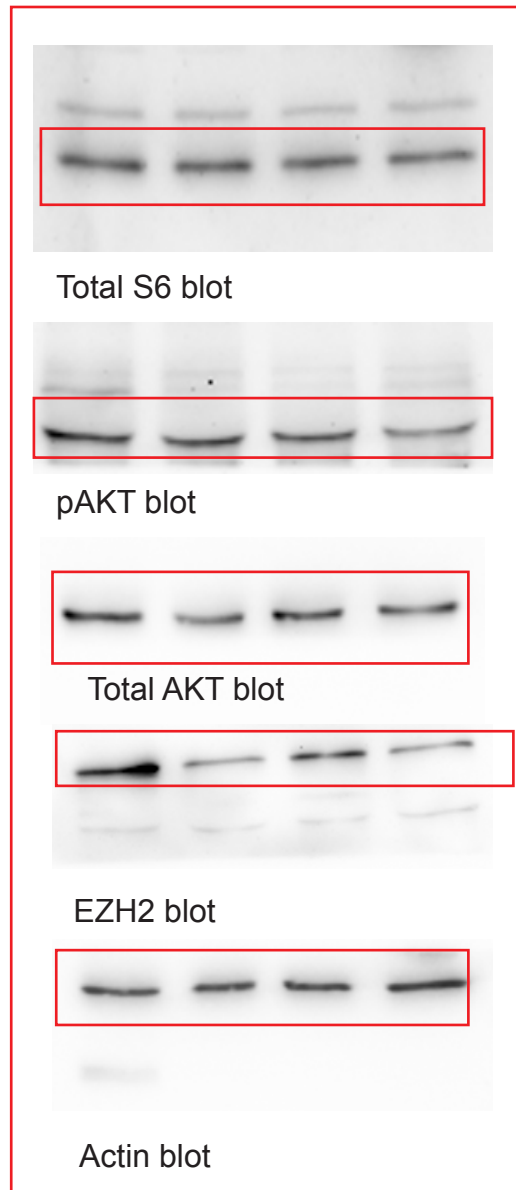

Figure 8b - HDMB03

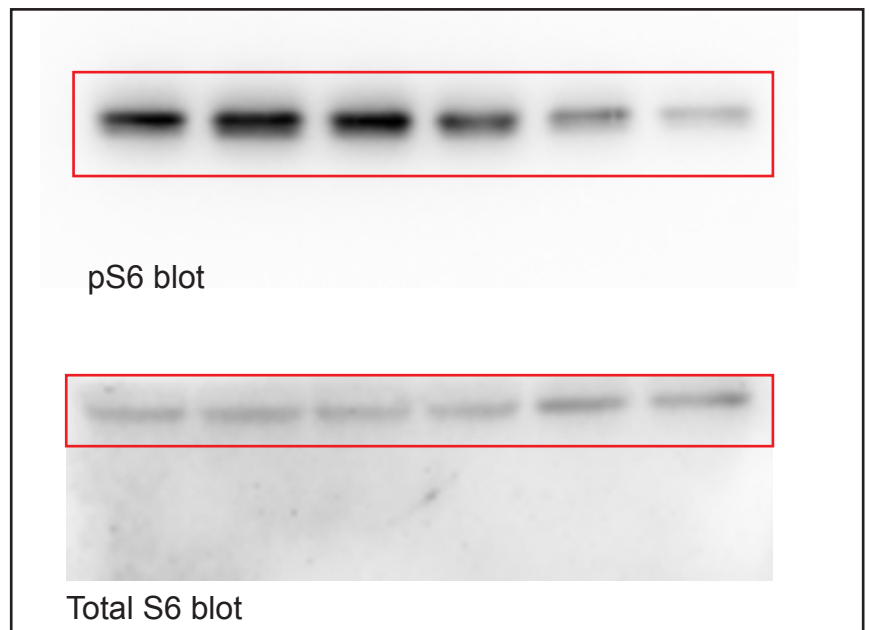

Figure 8b - HDMB03 - continued

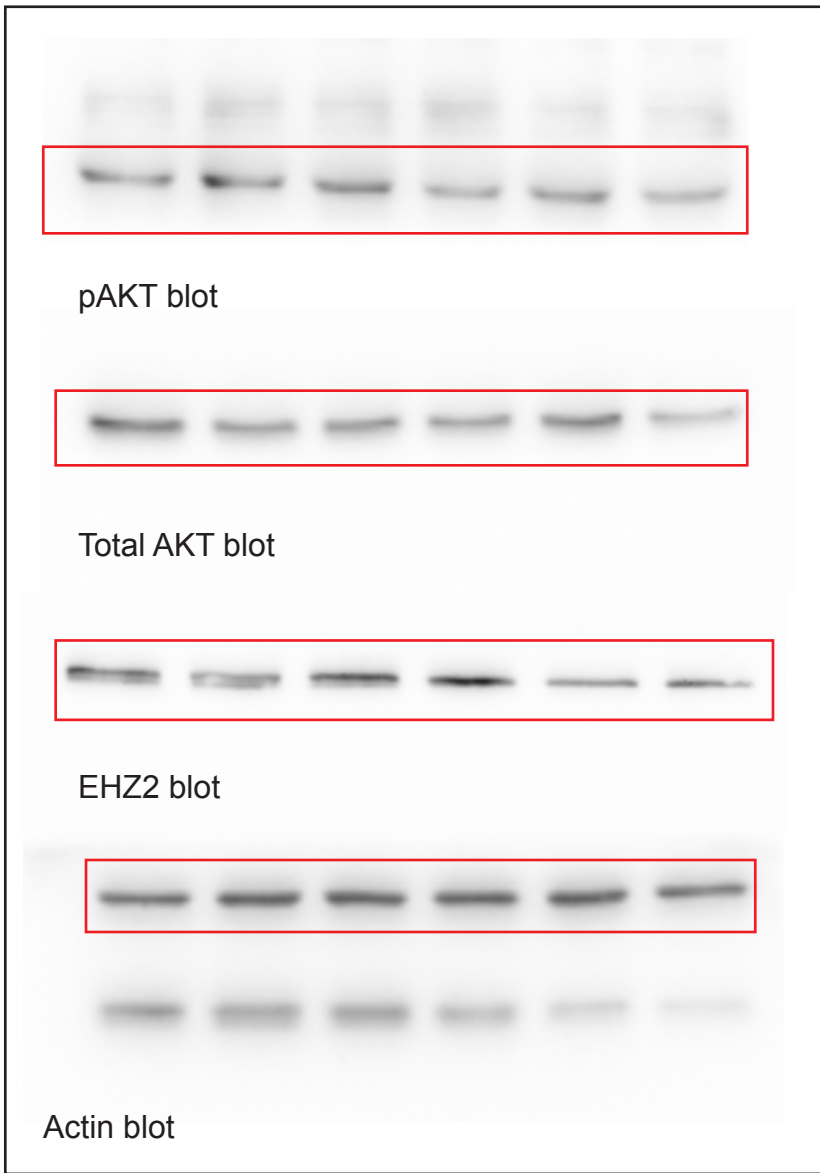

Figure 8b - MB3W1 continued

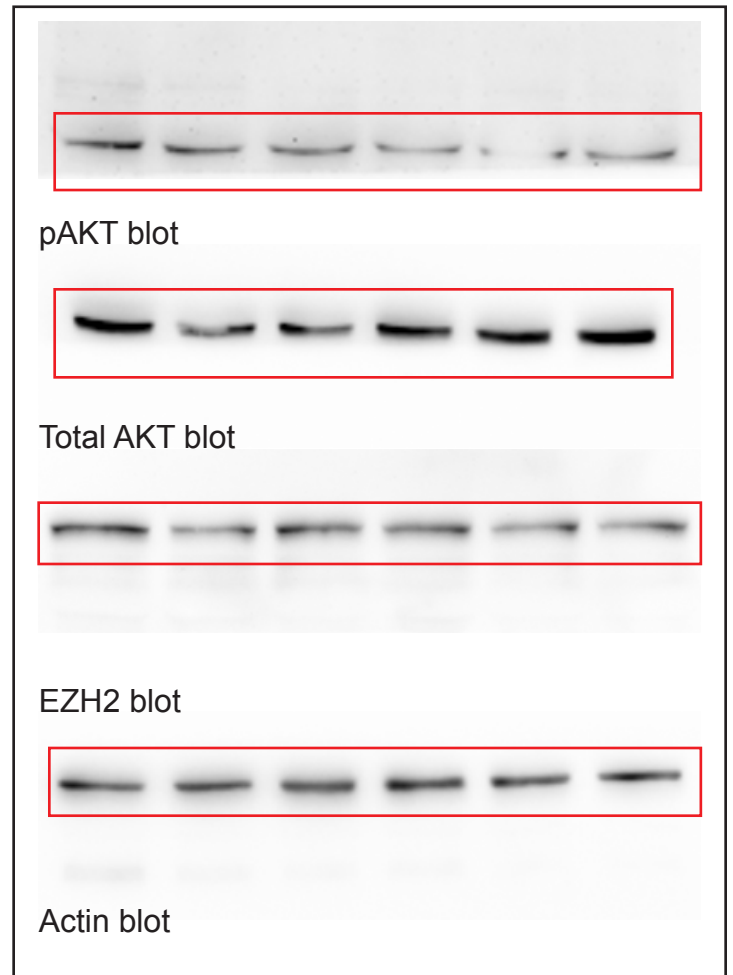

Figure 8b - MB3W1

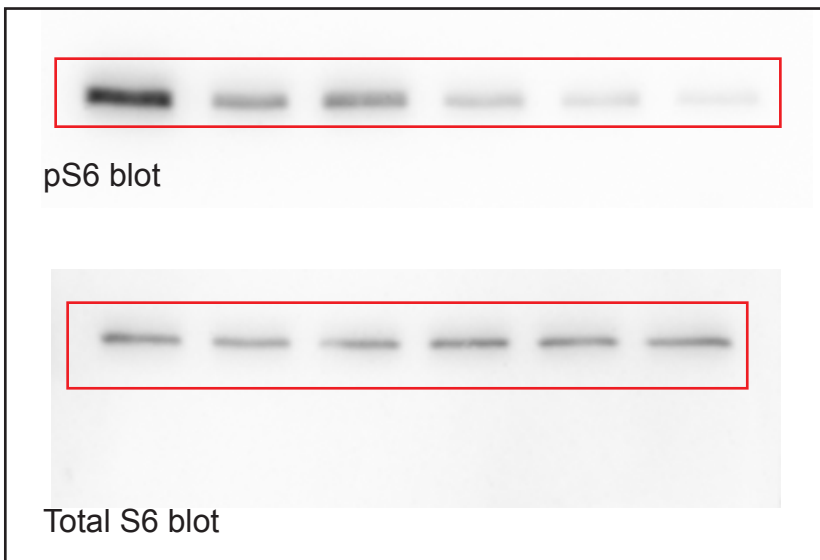

Figure 8k - HDMB03

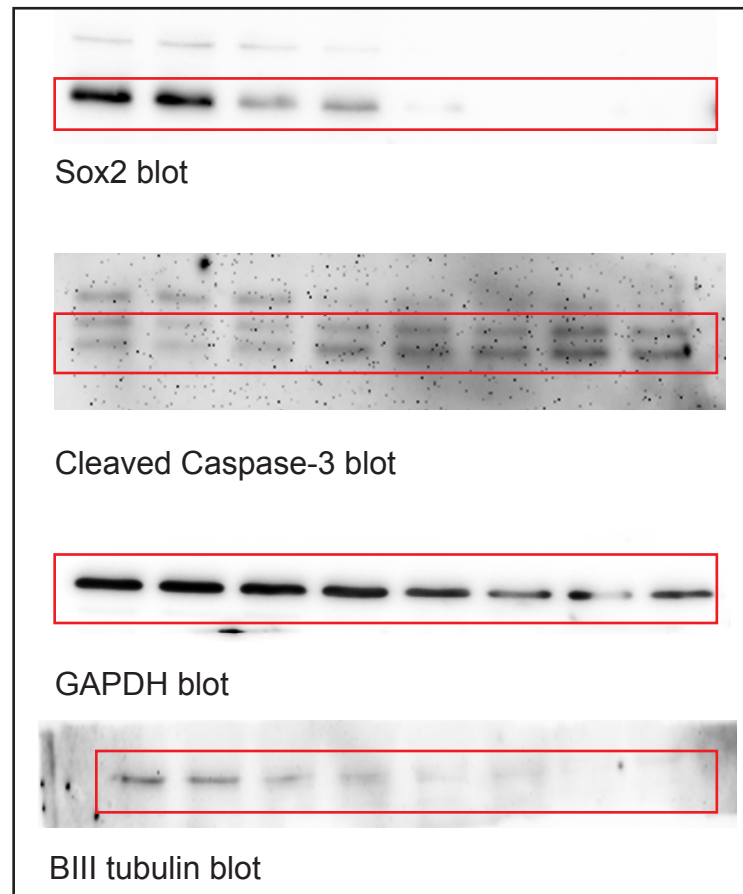

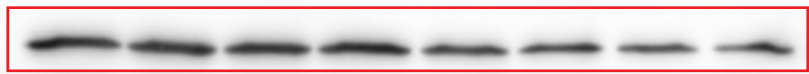

GAPDH blot

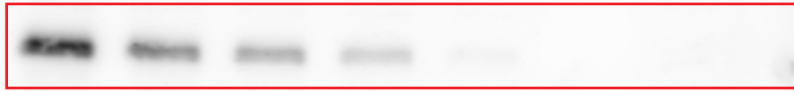

SOX2 blot

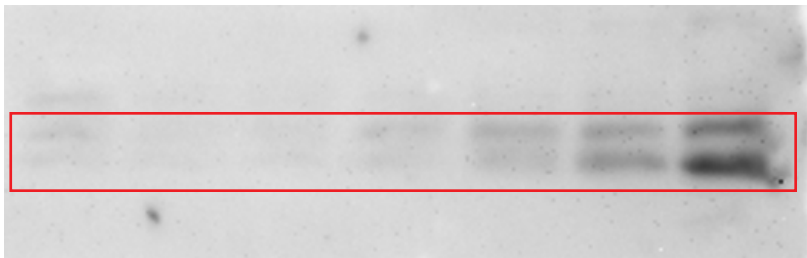

Cleaved Caspase 3 blot

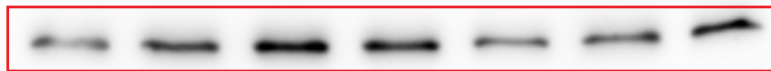

GAPDH blot

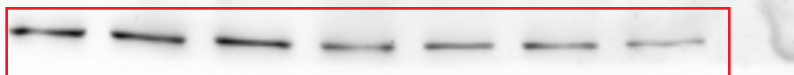

BIII tubulin blot

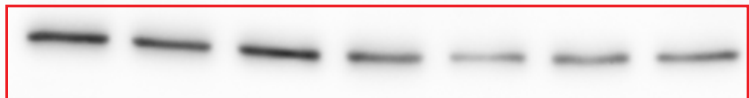

GAPDH blot

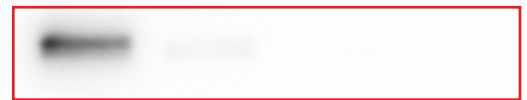

pS6 blot

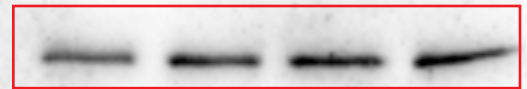

Total S6 blot
